## IL-7-adjuvanted vaginal vaccine elicits strong mucosal immune responses in non-human primates

1 Sandrine Logerot<sup>1</sup>, Suzanne Figueiredo-Morgado<sup>1</sup>, Bénédicte Charmeteau-de-Muylder<sup>1</sup>,  
2 Abdelkader Sandouk<sup>1</sup>, Anne-Sophie Drillet-Dangeard<sup>1</sup>, Morgane Bomsel<sup>1</sup>, Isabelle  
3 Bourgault-Villada<sup>1</sup>, Anne Couëdel-Courteille<sup>1</sup>, Rémi Cheynier<sup>1,\*§</sup> and Magali Rancez<sup>1,§</sup>.

4

5 1 Université de Paris, INSERM, CNRS, Institut Cochin, F-75006, Paris, France

6

7

8

9 § Equally contributed

10 \* **Correspondence:**

11 Rémi Cheynier

12 remi.cheynier@inserm.fr

13

14

15 Text: 7894 words

16 Figures: 7

17 Figures and Tables in supplementary material: 6

18

19 **Running title:** Interleukin-7: a mucosal vaccine adjuvant

20

21 **Keywords:** mucosal adjuvant, interleukin-7, female genital tract, mucosal immune  
22 responses, non-human primates, chemokine, plasma cells, tertiary lymphoid structure

## 23 **Contribution to the Field Statement**

24

25 Mucosal immune responses are essential to protect against pathogens entering through  
26 mucosal surfaces. However, the development of mucosal immunity remains difficult to  
27 stimulate and requires effective mucosal adjuvants.

28 We have previously evidenced a new function for IL-7. Overexpressed in the intestines of  
29 acutely SIV-infected macaques, IL-7 stimulates the recruitment of immune cells into  
30 infected tissues, contributing to the development of the immune responses, suggesting its  
31 possible use as a mucosal adjuvant.

32 We have showed here that non-traumatic vaginal administration of recombinant  
33 glycosylated simian IL-7 to macaques prior to antigen administration, allows the  
34 development of a strong mucosal immune response, through the local recruitment of  
35 immune cells induced by local expression of chemokine, the activation of mDCs and the  
36 formation of tertiary lymphoid structures in the vaginal mucosa. The mucosal localization of  
37 antigen-specific IgA plasma cells argues for their contribution to the high levels of specific  
38 IgAs evidenced in vaginal secretions.

39 We thus conclude that IL-7, already used in clinics without major adverse effects, can serve  
40 as an adjuvant to stimulate the mucosal immune system of the female genital tract and  
41 induce vaginal antibody responses following local immunization, most likely the best way to  
42 protect against sexually transmitted diseases.

43

44 **ABSTRACT**

45 Mucosal immune responses are crucial in protecting against pathogens entering through  
46 mucosal surfaces. However, due to difficulties in disrupting the tolerogenic environment  
47 associated with mucosa, mucosal immunity remains difficult to stimulate through vaccines  
48 and requires appropriate adjuvants. We previously demonstrated that either administered  
49 systemically to healthy macaques or locally expressed in the intestinal mucosa of acutely  
50 SIV-infected macaques, interleukin-7 (IL-7) triggers chemokine expression and immune cell  
51 homing into mucosae, suggesting its important role in the development of mucosal immune  
52 responses.

53 We therefore examined whether local delivery of recombinant glycosylated simian IL-7 (rs-  
54 IL-7gly) to the vaginal mucosa of rhesus macaques could prepare the lower female genital  
55 tract (FGT) for subsequent immunization and act as an efficient mucosal adjuvant.

56 First, we showed that local administration of rs-IL-7gly triggers vaginal overexpression of  
57 chemokines and infiltration of mDCs, macrophages, NKs, B- and T-cells in the chorion  
58 while MamuLa-DR<sup>+</sup> APCs accumulated in the epithelium. Subsequent mucosal anti-DT  
59 immunization in macaques resulted in a faster, stronger, and more persistent mucosal  
60 antibody response compared to DT-immunization alone. Indeed, we detected robust  
61 productions of DT-specific IgAs and IgGs in their vaginal secretions and identified cells  
62 secreting DT-specific IgAs in their vaginal mucosa and IgGs in draining lymph nodes.

63 Finally, the expression of chemokines involved in the organization of tertiary lymphoid  
64 structures (TLS) was only increased in the vaginal mucosa of IL-7-adjuvanted immunized  
65 macaques. Interestingly, TLSs developed around PNA<sup>+</sup> high endothelial venules in their  
66 lower FGT sampled 2 weeks after the last immunization.

67 Non-traumatic vaginal administration of rs-IL-7gly prepares the mucosa to respond to  
68 subsequent local immunization and allows the development of a strong mucosal immune  
69 response in macaques, through the chemokine-dependent recruitment of immune cells, the  
70 activation of mDCs and the formation of TLSs. The localization of DT-specific IgA plasma  
71 cells in the mucosa argues for their contribution to the production of specific  
72 immunoglobulins in the vaginal secretions. Our results highlight the potential of IL-7 as a  
73 potent mucosal adjuvant to stimulate the FGT immune system and elicit vaginal antibody  
74 responses to local immunization, which is the most promising way to confer protection  
75 against many sexually transmitted diseases.

## 76 INTRODUCTION

77 Mucosae form a physical barrier that limits the invasion of pathogens in the host but also  
78 ensures important physiological functions that require a certain degree of porosity. Because  
79 of their locations and these two antagonistic characteristics, mucosae are equipped with a  
80 peculiar immune system that constitutes a first line of defense for the organism. IgAs have a  
81 compartmentalized distribution and repertoire that are believed to contribute to the  
82 protection of mucosal surfaces. Strengthening mucosal immunity should be effective in  
83 increasing protection against invasive pathogens, but it is difficult to achieve through  
84 systemic vaccination.

85 The administration of a vaccine on mucosal surfaces is a promising way of inducing such  
86 immunity, however, it is a method that necessitates adequate adjuvants and is less often  
87 explored. The development of such an adjuvant requires understanding the specific  
88 mechanisms involved in establishing protective mucosal immunity and adapting the  
89 adjuvants to each specific mucosa. Indeed, contrarily to a generally accepted idea, the  
90 mucosal immune system certainly does not use common mechanisms to develop immune  
91 responses at all sites. Indeed, distinct vaccination routes, oral, nasal, sublingual, rectal or  
92 vaginal, stimulate mucosal immunity in different locations (1, 2). Furthermore, vaginal  
93 immunization leads to more robust vaginal IgG and IgA antigen-specific antibody responses  
94 than parenteral immunization or immunization at other mucosal sites (3, 4).

95 In the presence of antigens on the mucosal surface, the induction of mucosal immune  
96 responses occurs in organized mucosal lymphoid tissues and in draining lymph nodes (LNs).  
97 In the mucosa, epithelial cells serve as sensors that detect microbial components through  
98 pattern-recognition receptors and transfer signals to underlying mucosal cells to trigger  
99 innate, non-specific defenses and promote adaptive immune responses. The signals involved  
100 in the differentiation and tissue homing of antigen-specific lymphocytes in the different  
101 mucosae remain to be fully defined but, as a whole, this mechanism leads to the preferential  
102 development of immune responses at the site where the antigen or the pathogen was initially  
103 encountered.

104 It is known that the tissue-specific expression of chemokines, integrins and homing  
105 receptors are involved in immune cells homing to the FGT, however, there is less research  
106 conducted on the mechanisms involved in cells homing to the FGT than in the gut or the  
107 lungs. Various chemokines were identified to induce cell homing into the vaginal mucosa  
108 (CCL2 (MCP-1), CCL5 (RANTES), CCL7 (MCP-3), CCL20 (MIP-3 $\alpha$ ), CXCL8 (IL-8),  
109 CXCL9 (Mig), CXCL10 (IP-10) CXCL12 (SDF-1), CCL28 (MEC)... ) (5-12). In addition,  
110  $\alpha 4\beta 7$  and  $\alpha 4\beta 1$  integrins have been described as participating in the development of vaginal  
111 immunity in mice (13, 14). Besides, the expression of the vascular cell adhesion molecule-1  
112 (VCAM-1), which binds to these integrins, has been detected in the human vagina (15) and  
113 is overexpressed during inflammatory processes in mice, which suggests a role in cell  
114 recruitment into the genital mucosa (16, 17).

115 Considering the still incompletely described chemokine/integrin network in the genital  
116 mucosa, the identification of a strategy to stimulate the physiological expression of this  
117 complex network triggered by antigenic stimulation could help the development of an  
118 effective mucosal adjuvant. Various cytokines such as GM-CSF, IL-2, IL-12, IL-15 and IL-  
119 18 and chemokines such as CXCL8, CCL5, CCL3 (MIP-1 $\alpha$ ), CCL4 (MIP-1 $\beta$ ), CCL19  
120 (MIP-3 $\beta$ ), CCL20, CCL21 (6Ckine), CCL25 (TECK), CCL27 (CTACK) or CCL28 have  
121 been tested, mainly in mice, as potential adjuvants for the development of mucosal  
122 immunity (12, 18-21). So far, these studies have remained largely disappointing. In contrast,  
123 thymic stromal lymphopoietin (TSLP) administered nasally together with antigens as well as



124 CXCL9 and CXCL10 intravaginal administration after s.c. immunization acted as a potent  
125 mucosal adjuvant in mice (22, 23). Finally, lymphotactin (XCL1) and defensins exerted  
126 weak adjuvant activity for mucosal immunity when administered nasally with antigens (24).

127 Recently we and others have evidenced an overexpression of interleukin-7 (IL-7), a cytokine  
128 constitutively expressed by mucosal epithelial cells, in tissues following viral and bacterial  
129 infections (25-27). During the acute phase of these infections, this cytokine triggers the  
130 mucosal expression of various chemokines, favors integrin and chemokine receptor  
131 expression by T-cells and leads to immune cell homing into various mucosal tissues of both  
132 humans and rhesus macaques (25, 28, 29). In addition, IL-7 has been shown to play an  
133 important role in the formation of tertiary lymphoid organs (30-33). Moreover, IL-7 also  
134 contributes to lymphangiogenesis (34). Increased levels of IL-7 observed in infected tissues  
135 could thus participate in the induction of antigen-specific immune responses in infected  
136 mucosae.

137 Considering that IL-7, either systemically administered or locally expressed in acutely  
138 infected tissues, triggers both the expression of chemokines in tissues and the homing of  
139 immune cells into lymphoid and non-lymphoid organs (25, 28, 29), we investigated whether  
140 local administration of low doses of IL-7 directly at the surface of the vaginal mucosa could  
141 prepare it for subsequent immunization. We evidenced that non-traumatic topical  
142 administration of IL-7 triggers major physiological modifications of the vaginal mucosa,  
143 characterized by local production of a specific panel of chemokines and infiltration of  
144 various immune cells into the chorion. Moreover, we have demonstrated an efficient local  
145 immune response in the IL-7-treated vaginal mucosa following local immunization against  
146 diphtheria toxoid (DT) used as a model immunogen. Our results emphasize the potential of  
147 IL-7, already used in clinics without major adverse effects (35), as a potent mucosal  
148 adjuvant to stimulate the FGT mucosal immune system.

149

## 150 **MATERIALS AND METHODS**

### 151 **Animals, drug administration and tissue collection**

152 The healthy Chinese female rhesus macaques (*Macaca mulatta*) included in this study were  
153 housed, cared for, and handled in BSL2 NHP facilities of the Institut Pasteur (Paris, France;  
154 accreditation no. A 78-100-3) and IDMIT (“Infectious Disease Models and Innovative  
155 Therapies” at the CEA “Commissariat à l’Energie Atomique,” Fontenay-aux-Roses, France;  
156 accreditation no. C 92-032-02). Approval number 2010-0008 for the use of monkeys in this  
157 protocol was obtained from the ethics committee of Paris 1. All animal handling was carried  
158 out under ketamine anesthesia, in accordance with European regulations. The animals were  
159 seronegative for SIV<sub>mac</sub>, simian T-cell leukemia virus type 1, simian retrovirus type 1 (type  
160 D retrovirus), and herpes virus B.

161 Recombinant glycosylated simian IL-7 (rs-IL-7gly) was obtained from Cytheris SA (now  
162 Revimmune Inc., France) and administered either through intra-mucosal injection at several  
163 sites of the vaginal walls (4 injections per macaque), together with black Indian ink (1 to 10  
164 ng/injection site, in 20µL of 1/24 Indian ink, in calcium free Dulbecco’s phosphate buffered  
165 saline (PBS), n=8 macaques) or by vaginal spray using the APTAR bidose spray device (1  
166 to 15µg in 200µL of PBS per spray, n=17 macaques). Control animals were untreated or  
167 injected with Indian ink alone (n=8 macaques), or sprayed with PBS (n=3 macaques).

168 Immunization against diphtheria toxoid (DT) was performed through non-traumatic  
169 administration of DT (Biological Laboratories, Courtaboeuf, France; 7µg per animal, in

170 200 $\mu$ L of PBS) into the vaginal lumen, using the APTAR bidose spray device.  
171 Immunizations were repeated with an identical protocol at week 16 (boost 1) and week 31  
172 (boost 2) after prime immunization, and all the macaques were euthanized 2 weeks after a  
173 third boost immunization performed at week 55 after prime immunization.

174 Cervico-vaginal lavages (CVL) and blood samples were taken from each animal at baseline  
175 and every week throughout the protocol. Each CVL sample was collected using a sterile  
176 pipette by inserting in the vaginal cavity 2 mL of sterile PBS which was re-aspirated with  
177 the same pipette (12 to 20x), and then added in a sterile 15 mL tube containing antibiotics  
178 (200 U/mL penicillin and 200  $\mu$ g/mL streptomycin, final concentrations) and protease  
179 inhibitors used according to the manufacturer's recommendations (1X of cOmplete<sup>TM</sup>,  
180 EDTA-free Protease Inhibitor Cocktail, Roche Applied Science, Meylan, France). CVLs  
181 were centrifuged at 1,800rcf for 1 hour at 4°C then cleared using Spin-X<sup>®</sup> Tubes centrifuged  
182 at 16,000rcf for 30min at 4°C (Sigma-Aldrich, Lyon, France), aliquoted, and stored at -80°C  
183 until use.

184 Vaginal biopsies were taken using biopsy forceps from non-injected healthy animals and at  
185 the sites of Indian ink injections (administered alone or together with rs-IL-7gly), 24 or 48  
186 hours after injection, from non-sprayed healthy animals and 48 hours after the  
187 administration of rs-IL-7gly by vaginal spray using the APTAR bidose device, as well as 4  
188 weeks before primary anti-DT immunization and 4 weeks after each anti-DT immunization  
189 (post-prime and post-boosts n°1 and n°2).

190 Immediately after sampling, the biopsies were either placed in 600  $\mu$ L of RLT buffer from  
191 the RNeasy kit (Qiagen, Courtaboeuf, France) or snap-frozen in an Optimal Cutting  
192 Temperature compound (Tissue-Tek<sup>®</sup> O.C.T.<sup>TM</sup> Compound, Labonord, Templemars,  
193 France) in isopropanol cooled with liquid nitrogen and stored at -80°C until use.

194 At necropsy, both the entire vagina and iliac lymph nodes (LNs) were collected and  
195 immediately treated for future analyses. Pieces of vaginal tissue (4mm<sup>2</sup>), sampled from the  
196 lower and upper parts of the vaginal mucosa or from the vaginal fornix, were either frozen at  
197 -80°C in RLT buffer (Qiagen) for future RNA extraction or snap frozen using O.C.T.<sup>TM</sup> and  
198 preserved at -80°C. Pieces of iliac LNs were similarly processed for further analysis.  
199 Peripheral blood mononuclear cells (PBMCs) were purified by Ficoll density gradient  
200 centrifugation and conserved in liquid nitrogen in fetal calf serum 10%DMSO until use.

## 201 **Laser capture microdissection of vaginal mucosal tissue**

202 Twelve- $\mu$ m thick cryosections of vaginal tissues were collected on a polyethylene foil slide  
203 (SL Microtest GmbH, Jena, Germany) and stored at -80°C until use. The cryosections were  
204 then air dried for 5 minutes, counterstained with hematoxylin for 30 seconds, air dried, and  
205 microdissected as previously described (36). Epithelial tissue and chorion were individually  
206 sampled from 3 to 5 consecutive sections and each microdissected tissue was immediately  
207 placed in 80 $\mu$ L of ice-chilled RLT buffer (Qiagen) and stored at -20°C until RNA  
208 extraction. For each microdissected sample, RNAs were extracted from >2mm<sup>2</sup> of  
209 epithelium and >5mm<sup>2</sup> of chorion.

## 210 **Real-time PCR quantifications**

211 mRNAs were extracted from mucosal biopsies, as previously described (25), or from  
212 microdissected samples using the RNeasy tissue kit (Qiagen). Briefly, for microdissected  
213 samples, 300 to 400 $\mu$ L of tissue-containing RLT buffer (Qiagen) were extensively vortexed  
214 for 3 minutes then centrifuged for 3 minutes (16,000rcf). Residual DNA was removed from  
215 the cleared lysate using DNase digestion on columns (Qiagen). mRNAs were eluted in 40 $\mu$ L

216 of RNase-Free water. mRNAs recovered from microdissected samples or vaginal biopsies  
217 (about 1 mm<sup>3</sup>) were reverse-transcribed with the QuantiTect Rev Transcription Kit  
218 (Qiagen), used according to the manufacturer's recommendations, and cDNAs were stored  
219 at -20°C until use.

220 The cDNAs were PCR amplified in a final volume of 50µL. PCR amplification consisted of  
221 an initial denaturation of 15 minutes at 95°C, followed by 22 (biopsy samples) or 28  
222 (microdissected samples) cycles consisting of 30 seconds at 95°C, 30 seconds at 60°C, and 3  
223 minutes at 72°C using outer 3'/5' primer pairs.

224 Multiplex PCR amplifications were optimized to allow simultaneous amplification of (i)  
225 CCL3, CCL11, CCL25 and CXCL8, (ii) CCL5, CCL20, CCL28 and CXCL10, (iii) CCL19  
226 and CCL21, (iv) CCL2 and CX<sub>3</sub>CL1, (v) CCL4, (vi) CCL7, (vii) CCL8, (viii) CCL17, (ix)  
227 CCL22, (x) CXCL12, (xi) CXCL13, (xii) CD132 and CD127, (xiii) IL-17A and IL-21, (xiv)  
228 TSLP, (xv) LTα, and (xvi) LTβ, together with the hypoxanthine phosphoribosyl transferase  
229 (HPRT) gene, used as a housekeeping gene. These PCR products were diluted 1/100 in  
230 water and used to individually quantify each of the chemokines, CD132, CD127, TSLP, IL-  
231 17A, IL-21, LTα, LTβ, or HPRT amplicons, in LightCycler<sup>®</sup> experiments using inner 3'/5'  
232 primer pairs, as previously described (25). The results were expressed as absolute numbers  
233 of target mRNA copies per HPRT mRNA copy. All the primers used in this study are  
234 described in **Supplementary Table 1**.

### 235 **Immunohistofluorescent staining**

236 Four-µm thick tissue sections fixed with formaldehyde and embedded in paraffin (FFPE)  
237 and eight-µm thick cryosections collected on glass slides (SuperFrost<sup>®</sup> Plus, Menzel-Gläser,  
238 Illkirch, France) were immunostained as described in the supplementary material. The  
239 antibodies used for immunohistofluorescence labeling are listed in **Supplementary Table 2**.

### 240 **Reverse immunohistofluorescent staining**

241 Reverse immunohistofluorescent staining was used to detect cells producing DT-specific  
242 antibodies. Ten-µm thick cryosections were fixed for 20 minutes at 4°C in 2% PFA and  
243 rinsed with PBS, permeabilized with 0.2% triton for 8 minutes, rinsed with PBS, blocked  
244 with 5% BSA for 30 minutes in PBS, then a Streptavidin/Biotin Kit was used according to  
245 the manufacturer's recommendations (Vector Laboratories).

246 Tissue sections were incubated with rabbit anti-IgA or anti-IgG antibodies (DAKO) for 2  
247 hours at RT, rinsed in PBS/0.5%Tween20, then incubated overnight at 4°C with DT Ag  
248 (15µg/mL). Sections were rinsed in PBS/0.5%Tween20, incubated with goat anti-DT-FITC  
249 antibodies (Abcam) overnight at 4°C, then rinsed in PBS/0.5%Tween20, incubated with  
250 donkey anti-goat Biotin (Abcam) secondary antibodies, rinsed in PBS/0.5%Tween20,  
251 incubated with streptavidin-Alexa Fluor<sup>®</sup> 488 (Molecular Probes) in the dark for 15 minutes  
252 at RT, rinsed in PBS/0.5%Tween20, then blocked 30 minutes in 10% normal goat serum  
253 and 5% BSA in PBS. IgA or IgG staining were revealed with goat or donkey anti-rabbit-  
254 Alexa Fluor<sup>®</sup> 546 secondary antibodies (Molecular Probes) in the dark for 30 minutes at RT.

255 The tissue sections were rinsed in PBS/0.5%Tween20, then in PBS alone, counterstained  
256 with DAPI (Molecular Probes) and mounted in Fluoromount-G (Southern Biotechnology).  
257 The antibodies used for reverse immunohistofluorescence labeling are listed in  
258 **Supplementary Table 2**.

259 As controls for specificity, the anti-DT-FITC antibodies in combination with the Biotin-  
260 labeled anti-goat antibodies plus the streptavidin-Alexa-Fluor<sup>®</sup> 488 did not stain either DT-

261 coated vaginal mucosae or LNs from unimmunized animals, nor uncoated tissues of  
262 immunized macaques.

### 263 **Image capture and analysis**

264 The immunostained sections were examined under an inverted epifluorescence Leica  
265 microscope (DMI6000, Leica Microsystems GmbH, Wetzlar, Germany), equipped with an  
266 ORCA-Flash4.0 LT camera (Hamamatsu Photonics) and coupled with video imaging using  
267 the MetaMorph 7.8.8.0 software (Molecular Devices, Sunnyvale, CA, USA). Images were  
268 acquired digitally with a 10x or a 20x objective (Leica), then we used both Photoshop (CS5  
269 version, Adobe Systems Incorporated), and ImageJ (1.52p version) software to analyze the  
270 stainings. For color images, brightness and contrast were adjusted on each entire digitally  
271 acquired image, with the same levels for each labeling set, using the Brightness/Contrast  
272 command in Photoshop software.

273 Quantifications of cells and chemokines in tissue were performed on image reconstructions  
274 of the entire sections of the different vaginal biopsies. Sections were digitally acquired at the  
275 best focus with a 20x oil objective (Leica using the Yokogawa CSU X1 Spinning Disk  
276 (Yokogawa, Tokyo, Japan) coupled with a DMI6000B Leica microscope with MetaMorph  
277 7.7.5 software, using Scan-Slide option (10% overlap). Analyses were performed using an  
278 ImageJ routine provided by T. Guilbert (Institut Cochin, Paris, France).

279 Labeling of immune cells and chemokines was quantified in manually defined zones of  
280 chorion or epithelium. After a denoising process, manual threshold was applied on CD3<sup>+</sup>,  
281 CD4<sup>+</sup>, CD8<sup>+</sup>, CD20<sup>+</sup>, CD11c<sup>+</sup>, DC-SIGN<sup>+</sup>, PM-2K<sup>+</sup>, MamuLa-DR<sup>+</sup>, CD83<sup>+</sup> stainings to  
282 identify immune cell surfaces, and on CCL2<sup>+</sup>, CCL5<sup>+</sup>, CCL7<sup>+</sup>, CCL19<sup>+</sup>, CXCL12<sup>+</sup>, and  
283 CXCL13<sup>+</sup> stainings to define chemokine expression surfaces. CD3<sup>+</sup>CD4<sup>+</sup>, CD3<sup>+</sup>CD8<sup>+</sup> and  
284 CD11c<sup>+</sup>CD83<sup>+</sup> double positive cells, as well as CD3<sup>+</sup>, CD3<sup>+</sup>CD8<sup>+</sup>, CD20<sup>+</sup>, CD11c<sup>+</sup>, CD11c<sup>-</sup>  
285 DC-SIGN<sup>+</sup> and PM-2K<sup>+</sup> single positive cells were automatically counted in the chorion  
286 areas, while CD20<sup>+</sup>MamuLa-DR<sup>+</sup> single positive cells were automatically counted in both  
287 the chorion and the epithelium zones. Results were expressed as the number of cells per  
288 mm<sup>2</sup> of chorion or epithelium.

289 Chemokine<sup>+</sup> surfaces were automatically quantified in the manually defined zones of  
290 chorion and epithelium. Results were expressed as the sum of simply stained surfaces/total  
291 surface analyzed. For each staining, at least 1.2 mm<sup>2</sup> of chorion and 0.9 mm<sup>2</sup> of epithelium  
292 surfaces were analyzed per macaque. Quantifications were performed on 5 to 8 macaques, 2  
293 to 3 biopsies per macaque amongst 4 biopsies sampled both at D-30 and 48 hours post-rs-  
294 IL-7gly, and 3-4 or 2-3 independent zones of chorion or epithelium were defined,  
295 respectively (except for CD11c<sup>+</sup>CD83<sup>+</sup> cells quantification: 4 macaques). Image analysis  
296 quantification was performed independently by at least two people.

297 Lymphoid follicles were enumerated in high-powered entire reconstitutions of vaginal  
298 sections acquired with the Lamina™ Multilabel Slide Scanner (PerkinElmer, Courtaboeuf,  
299 France), manually counting 8 to 14 sections per macaque. The chorion surfaces were  
300 manually outlined, and lymphoid follicles were highlighted manually and then automatically  
301 quantified with CaseViewer software (3DHISTECH, Budapest, Hungary). The results were  
302 expressed as the number of follicles per 50 mm<sup>2</sup> of chorion. Two people performed image  
303 analysis quantifications independently.

304 The proportions of T- and B-cells in lymphoid follicles were assessed on vaginal mucosa at  
305 necropsy, using ImageJ (1.52p version) on sections acquired with a 20x objective.  
306 Lymphoid follicles were manually defined on the DAPI channel, manual thresholds were  
307 applied on CD3<sup>+</sup> and CD20<sup>+</sup> stains to automatically measure CD3<sup>+</sup> and CD20<sup>+</sup> stained



308 surfaces. Nuclei (DAPI) were also quantified in the follicles. Results were expressed as the  
309 number of B-cells over total cell numbers in each follicle. The quantifications were  
310 performed on 7 to 21 follicles per macaque. Two people performed image analysis  
311 quantifications independently.

### 312 **Quantification of total and DT-specific IgGs and IgAs by enzyme-linked** 313 **immunosorbent assay**

314 Total and DT-specific immunoglobulin (IgGs and IgAs) were quantified in CVLs using in-  
315 house ELISA, as described in the supplementary material. Total IgA or IgG concentrations  
316 were determined by interpolation, using the calibration line of IgA or IgG standards,  
317 respectively. For the quantification of specific Igs, samples with a signal at least twice above  
318 the background were considered positive. The results were expressed as OD (in IgA or IgG  
319 anti-DT ELISA) over the concentration of IgAs or IgGs in a given sample.

### 320 **Preparation of cells for ELISPOT assay**

321 The lower FGT and the iliac LN cells were isolated as described in the supplementary  
322 material. Cell number and viability were determined by trypan blue exclusion.

### 323 **Quantification of antibody-secreting cells by B-cells ELISPOT**

324 Antibody secreting cells (ASCs) were assayed in Multiscreen HA plates (Merck Milipore,  
325 Molsheim, France) coated with DT (10 $\mu$ g/mL), as described in the supplementary material.  
326 The spot numbers were reported as DT-specific ASCs per million PBMCs. In the wells used  
327 as specific controls, the ELISPOT Reader detected 0 to 2 spots for the anti-IgAs, and 1 to 4  
328 spots for the anti-IgGs, in DT-coated wells with cells from non-immunized animals,  
329 uncoated wells with cells from immunized animals or wells incubated without cells.

### 330 **Statistical analysis**

331 Non-parametric Mann-Whitney U tests, Wilcoxon Signed-Rank Tests and multivariate  
332 analysis of variance (MANOVA) with the post hoc analyses, and Fisher least significant  
333 difference (LSD) tests were performed using StatView (5.0 version, Abacus software). A p  
334 value <0.05 is considered as significant.

335

## 336 **RESULTS**

### 337 ***Local administration of rs-IL-7gly elicits chemokine expressions by the vaginal mucosa***

338 In a first series of experiments, recombinant glycosylated simian IL-7 (rs-IL-7gly) was  
339 injected into the vaginal mucosa of 8 healthy rhesus macaques (1 to 10 ng/injection site, 4  
340 injections per animal, together with Indian ink in order to locate the injection sites). Twenty-  
341 four and forty-eight hours after inoculation, IL-7-injected and control zones were biopsied  
342 and mRNAs coding for 12 chemokines were quantified by qRT-PCR. Six chemokines  
343 (CCL5, CCL19, CCL28, CXCL8, CXCL10 and CXCL12) demonstrated a significantly  
344 higher transcription level in the IL-7-treated zones sampled 48 hours after inoculation,  
345 compared to control biopsies (n=3 and n=9 macaques, respectively; **Figure 1A**). In contrast,  
346 these overexpressions were neither observed in biopsies sampled 24 hours after rs-IL-7gly  
347 injection (n=5 macaques) nor in biopsies injected with Indian ink alone (n=8 macaques),  
348 with the exception of CXCL10 (**Figure 1A**), suggesting a consequence of the needle prick  
349 itself. By analyzing the expression of chemokines in microdissected epithelium and chorion,  
350 we then demonstrated that IL-7 driven chemokine transcription was located in the chorion  
351 (CCL19 and CXCL12) or in the epithelium (CCL28) or in both (CCL5, CXCL8 and

352 CXCL10; **Figure 1B**). These data demonstrate that a few nanograms of rs-IL-7gly, directly  
353 injected into the vaginal mucosa, are sufficient to trigger a significant enhancement of local  
354 chemokine expressions, which can be measured 48 hours after administration.

355 We then investigated the effect of the non-traumatic administration of rs-IL-7gly directly  
356 sprayed onto the vaginal mucosal surface of healthy rhesus macaques. Nine healthy  
357 macaques were administered with 1 $\mu$ g (n=2), 5 $\mu$ g (n=2), 10 $\mu$ g (n=3) or 15 $\mu$ g (n=2) of rs-IL-  
358 7gly. The expression of 19 chemokines and 5 cytokines was measured by qRT-PCR in  
359 vaginal biopsies sampled 48 hours after IL-7 administration. Interestingly, while the  
360 administration of 1 and 5 $\mu$ g did not impact the mucosal expression of chemokines, animals  
361 treated with either 10 $\mu$ g or 15 $\mu$ g of rs-IL-7gly demonstrated a significantly enhanced  
362 mRNA level for 11 chemokines (**Figure 1C** and **Supplementary Figure 1**) compared to the  
363 baseline. Among these, CCL5, CCL17 (TARC), CCL19, CXCL10 and CXCL12 were  
364 constitutively expressed at the baseline (**Figure 1C**, left panel), while CCL7, CCL20,  
365 CCL22 (MDC), CCL28, CXCL13 (BCA-1), CX<sub>3</sub>CL1 (Fractalkine) were scarcely  
366 transcribed before IL-7 treatment (**Figure 1C**, central panel). Finally, the vaginal expression  
367 of CCL3, CCL4, CCL8 (MCP-2), CCL11 (Eotaxin), CCL21 and CCL25 was not  
368 significantly modified upon stimulation with IL-7 (**Figure 1C**, right panel). Among the  
369 cytokines tested, only IL-17A and TSLP demonstrated enhanced expression in IL-7-treated  
370 vaginal mucosa (mean IL-17A expression: 0.04 and 0.32 copies/HPRT copy in baseline and  
371 D2 samples, respectively; p<0.01; mean TSLP expression: 1.01 and 4.61 copies/HPRT copy  
372 in baseline and D2 samples, respectively; p<0.01; n=5 monkeys; **Supplementary Figure 2**).

373 We then analyzed the expression of chemokines, at the protein level, in IL-7-treated vaginal  
374 tissue samples taken 30 days before and 48 hours after the administration of rs-IL-7gly  
375 (10 $\mu$ g by spray). Increased amounts of these chemokines were observed by  
376 immunohistochemistry in either the epithelium or the chorion in samples gathered 48 hours after  
377 rs-IL-7gly administration (**Figure 2A**), confirming mRNA quantifications. Quantification of  
378 labeled surfaces using ImageJ software (see Methods) demonstrated that CCL7, CCL2,  
379 CXCL13 and CCL5 expressions were increased in the chorion (1.5-, 1.9-, 2- and 3.4-fold,  
380 respectively; p<0.02; **Figure 2B**) while only CCL7, CCL2 and CCL5 were overexpressed in  
381 the epithelium (1.7-, 1.8- and 1.9-fold, respectively; p<0.05; **Figure 2C**).

382 These different chemokines are often described as produced either by myeloid cells or by  
383 resident mucosal cells, suggesting that these cells could sense IL-7 through expression of the  
384 IL-7 receptor. Accordingly, we investigated the expression of CD127 (the alpha chain of the  
385 IL-7 receptor) by various types of cells composing the vaginal mucosa. In addition to CD3<sup>+</sup>  
386 T-cells, many different CD3<sup>+</sup>MamuLa-DR<sup>+</sup> cells effectively expressed CD127 (**Figure 2D**  
387 and **Supplementary Figure 3**). These cells were mostly CD11c<sup>+</sup> dendritic cells (**Figure 2D**,  
388 panel D2; yellow arrows). Likewise, some CD11c<sup>+</sup>CD68<sup>+</sup> or CD11c<sup>+</sup>CD163<sup>+</sup> cells, likely  
389 representing mucosal pro-inflammatory “M1” macrophages or cells with a mixed “M1/M2”  
390 phenotype, also expressed CD127 (**Figure 2D**, panels D3 and D4; yellow arrows). Finally, a  
391 few CD11c<sup>+</sup>MamuLa-DR<sup>-</sup> cells, presumably NK-cells, also expressed CD127 (**Figure 2D**,  
392 panel D2; red arrows).

393 Furthermore, CD127 was expressed by CD31<sup>+</sup> endothelial cells but not by surrounding  
394  $\alpha$ SMA<sup>+</sup> (alpha-smooth muscle actin) cells (**Figure 2D**, panels D5 and D6; white  
395 arrowheads). In contrast, some isolated  $\alpha$ SMA<sup>+</sup> cells expressed CD127. Finally, epithelial  
396 cells also presented CD127 staining (**Figure 2D**, panels D1, D2 and D6 and **Supplementary**  
397 **Figure 3**, panels B, C, D), with a more distinct expression by basal epithelial cells.  
398 Interestingly, we also evidenced both CD127 and CD132 transcription in epithelial cells  
399 isolated from the vaginal mucosa of healthy macaques, confirming the expression of the

400 entire IL-7 receptor (**Supplementary Figure 4**). Nonetheless, the expression of CD127 by  
401 epithelial cells remained significantly lower than on T-cells isolated from blood or  
402 secondary lymphoid organs (SLO) (7.8-fold and 4.2-fold in blood and SLO T-cells,  
403 respectively;  $p < 0.05$ ; **Supplementary Figure 4**).

404 Therefore, many cell types that compose the vaginal mucosa express the IL-7 receptor and  
405 may contribute to the chemokine production observed in IL-7-treated vaginal mucosa.

406 Altogether, these results demonstrate that the non-traumatic administration of rs-IL-7gly at  
407 the surface of the vaginal mucosa stimulates the local expression of a set of chemokines  
408 which may trigger immune cell migrations to the IL-7-treated mucosa.

#### 409 *Vaginal administration of IL-7 triggers the recruitment of immune cells into the vaginal* 410 *chorion*

411 We further evaluated the consequences of IL-7 mucosal treatment on the distribution of  
412 immune cells within the vaginal mucosa by performing immunohistofluorescent staining on  
413 both biopsies 2 days after administration of rs-IL-7gly by spray (10 $\mu$ g/animal, n=8  
414 macaques) and control biopsies. A significant increase in cell density, evidenced by nuclei  
415 counts per unit of tissue surface, characterized the mucosa treated with IL-7 (1994 $\pm$ 168 and  
416 3518 $\pm$ 326 cells per mm<sup>2</sup> of chorion in control and IL-7-treated samples, respectively;  
417  $p = 0.038$ ; data not shown). CD4<sup>+</sup> and CD8<sup>+</sup> T-cells, NK cells, B-cells, myeloid DCs (mDCs),  
418 macrophages, and MamuLa-DR<sup>+</sup> APCs were further quantified in the chorion on whole  
419 tissue sections using ImageJ software (**Figure 3A**). These quantifications confirmed that  
420 local rs-IL-7gly administration triggers massive infiltration of all the immune cell subsets  
421 we searched for in the vaginal mucosa (5.4-, 5.7-, 3.4- and 3.5-fold increase over baseline  
422 values for CD4<sup>+</sup> T-cells, CD8<sup>+</sup> T-cells, B-cells and NK cells, respectively;  $p < 0.01$ ,  $< 0.01$ ,  
423  $< 0.05$  and  $< 0.01$ ; **Figure 3B**). Similarly, APC numbers (DR<sup>+</sup>CD20<sup>-</sup> cells) were also  
424 massively increased in the vaginal chorion following local administration of rs-IL-7gly (2.9-  
425 fold increase;  $p < 0.05$ ). Among these, we identified CD11c<sup>+</sup> mDC, DC-SIGN<sup>+</sup> macrophages  
426 and PM-2K<sup>+</sup> tissue macrophages (4.7-, 3.1- and 1.6-fold increase;  $p < 0.01$ ,  $p < 0.05$  and  
427  $p = 0.076$ , respectively; **Figure 3C**). We noted that most of the PM-2K<sup>+</sup> tissue macrophages  
428 also expressed DC-SIGN in the vaginal mucosa (data not shown). Moreover, after the  
429 administration of rs-IL-7gly, CD11c<sup>+</sup>DC-SIGN<sup>+</sup> mDCs concentrated underneath the  
430 epithelium (**Figure 3A**) and expressed CD83 (21.4-fold increase after rs-IL-7gly treatment;  
431  $p = 0.021$ ; **Figures 3D-E**). Furthermore, following administration of rs-IL-7gly by spray, a  
432 significant increase in the numbers of APCs expressing MamuLa-DR was observed in the  
433 vaginal epithelium (39 $\pm$ 5 and 70 $\pm$ 8 cells/mm<sup>2</sup> in control and IL-7-treated macaques,  
434 respectively,  $p = 0.013$ ; **Figures 3G-H**).

435 These data demonstrate that, in the vaginal mucosa, the chemokine expressions induced by  
436 IL-7 treatment trigger the migration of APCs, B-cells, T-cells and NK cells into the chorion,  
437 and lead to the activation of mDCs, a prerequisite to the development of immune responses  
438 to local antigenic stimulation. Besides, the large numbers of MamuLa-DR<sup>+</sup> APCs localized  
439 in the epithelium after rs-IL-7gly administration could certainly help subsequently  
440 administered immunogens penetrate the mucosa.

#### 441 *IL-7-adjuvanted vaginal vaccine stimulates strong mucosal antibody responses*

442 We then tested the capacity of IL-7 to serve as an adjuvant in a mucosal immunization  
443 protocol against a model antigen. Six female rhesus macaques were immunized against  
444 diphtheria toxoid (DT) through local administration of the antigen (7 $\mu$ g of DT in 200 $\mu$ L of  
445 PBS) sprayed directly into the vaginal lumen. Two days prior to the immunization, these  
446 animals had been treated by local administration of rs-IL-7gly (group IL-7+DT; n=3; 10 $\mu$ g)

447 or PBS (group PBS+DT; n=3), by the same route. Anti-DT antibodies were quantified in  
448 mucosal secretions sampled over a 15-week period by cervico-vaginal lavages (**Figures 4A-**  
449 **B**). Interestingly, DT-specific IgGs were detected in the vaginal secretions of all IL-7-treated  
450 DT-immunized animals by week 2 or 3 (W2/3). These antibodies remained at a higher  
451 concentration for the subsequent 15 weeks, compared to animals receiving DT without  
452 pretreatment with IL-7 (**Figure 4A**;  $p < 0.001$ ). Indeed, among the control animals, one never  
453 developed any detectable DT-specific IgG response and the others showed a weak and  
454 sporadic response by W4. Similarly, DT-specific IgA responses appeared earlier and were  
455 stronger in the IL-7-treated DT-immunized animals as compared to the low and sporadic  
456 IgA response being detectable by W4/5 in 2 of the animals immunized without IL-7  
457 treatment (**Figure 4B**;  $p = 0.029$ ).

458 Boost immunizations were performed 16 and 31 weeks after prime immunization, using the  
459 same protocol. In all three IL-7-treated DT-immunized macaques, a rebound in both IgG  
460 and IgA vaginal DT-specific responses was observed, despite the fact that IgG response did  
461 not reach the levels observed early after prime immunization (**Figures 4C-D**). In contrast,  
462 no significant increase of the vaginal antibody responses (IgG or IgA) was observed in the  
463 animals immunized without IL-7 pretreatment. In these animals, sporadic DT-specific IgGs  
464 and IgAs were detected, their concentrations remaining lower than those in IL-7-treated  
465 animals (**Figures 4C-D**;  $p < 0.001$  and  $p = 0.003$ , respectively, for both boosts).

466 Immunoglobulins in vaginal secretions can be either produced by resident antibody-  
467 secreting cells (ASCs) in the mucosa or excreted by transudation of serum antibodies. We  
468 thus looked for DT-specific ASCs in the vaginal mucosa and draining LNs sampled from  
469 animals sacrificed 2 weeks after a third boost immunization performed 24 weeks after the  
470 second boost.

471 In both PBS- and IL-7-treated DT-immunized macaques, DT-specific IgA<sup>+</sup> plasma cells  
472 outnumbered DT-specific IgG<sup>+</sup> plasma cells. However, a higher density of DT-specific IgA<sup>+</sup>  
473 plasma cells characterized both the vaginal walls and the fornix (i.e. the glandular-rich  
474 mucosal region around the uterine cervix) of the IL-7-treated DT-immunized macaques  
475 (**Figure 5A**). Similarly, we evidenced a higher density of anti-DT ASC in the iliac LNs of  
476 animals treated with IL-7. However, in LNs, IgG<sup>+</sup> plasma cells predominate among the anti-  
477 DT ASCs (**Figure 5B**).

478 These data were confirmed by the quantification of IgA<sup>+</sup> anti-DT ASCs by ELISPOT  
479 performed on purified immune cells either from the vaginal mucosa (**Figure 5C**) or the iliac  
480 LNs of macaques from each group (IgG ASC: 81, 148 and 85 spots/10<sup>6</sup> cells and 17, 43 and  
481 22 spots/10<sup>6</sup> in macaques from the IL-7+DT and the PBS+DT groups, respectively;  $p < 0.05$ .  
482 IgA<sup>+</sup> DT-specific ASCs: 55, 56 and 8 spots/10<sup>6</sup> cells as compared to 10, 12 and 3 spots/10<sup>6</sup>  
483 cells in macaques from the IL-7+DT and the PBS+DT groups, respectively; **Figure 5D**).

#### 484 *IL-7-adjuvanted vaginal vaccine allows stronger systemic immune responses*

485 Having demonstrated the adjuvant potential of rs-IL-7gly through its capacity to improve  
486 mucosal DT-specific antibody responses, we further analyzed B-cell responses in both  
487 secondary lymphoid organs and blood.

488 The frequency of DT-specific ASCs of IgG and IgA isotypes was determined in blood  
489 samples collected at different time points after prime immunization and following the  
490 different boosts.

491 Two weeks after primary immunization, higher frequencies of DT-specific IgG<sup>+</sup> ASCs were  
492 observed in macaques immunized by local administration of IL-7+DT compared to those



493 receiving DT immunization alone (W2: 193, 82 and 73 DT-specific IgG<sup>+</sup> ASC/10<sup>6</sup> PBMCs  
494 in the IL-7-treated macaques compared to 2 and 64 in the control macaques) (**Figure 6A**).  
495 At later time points, these frequencies remained higher in IL-7-treated macaques (55, 41 and  
496 130 DT-specific IgG<sup>+</sup> ASC/10<sup>6</sup> PBMCs at W3 and 54, 29 and 89 at W5 in the 3 IL-7-treated  
497 macaques as compared to 11, 31, 13 and 7, 27, 39 in control animals; **Figure 6A**). The  
498 frequency of DT-specific IgG<sup>+</sup> ASCs increased after boost immunizations in both groups of  
499 macaques; the rebound of the immune response being higher following the second boost in  
500 IL-7-treated macaques. Unlike IgG<sup>+</sup> ASCs, circulating DT-specific IgA<sup>+</sup> ASCs remained  
501 low throughout the immunization protocol, their frequencies being slightly higher in IL-7-  
502 treated DT-immunized macaques (**Figure 6B**).

503 Altogether, these data demonstrate that rs-IL-7gly acts as a mucosal vaccine adjuvant. Its  
504 administration at the mucosal surface prior to immunization, accelerates, enhances and  
505 stabilizes the mucosal antigen-specific antibody responses triggered by local antigenic  
506 stimulation.

### 507 *IL-7-adjuvanted mucosal immunization induces ectopic lymphoid follicles in vaginal* 508 *mucosa*

509 To further explore the mechanisms involved in the induction of mucosal immunity in the  
510 vaginal mucosa of macaques treated with IL-7, we quantified the expression of chemokines  
511 involved in the development of tertiary lymphoid structures (TLS) in vaginal biopsies  
512 sampled at necropsy. The amount of mRNA encoding CCL19, CCL21, CXCL12, and  
513 CXCL13 (chemokines known to trigger lymphocytes trafficking and aggregation in tissues)  
514 was increased in vaginal tissues collected from IL-7-adjuvanted immunized macaques (6.1-  
515 4.9-, 25.8- and 54.2-fold over pre-immunization values for CCL19, CCL21, CXCL12 and  
516 CXCL13, respectively; p<0.05 as compared to control animals; **Figure 7A**). Similar data  
517 were obtained in biopsies sampled 4 weeks after each rs-IL-7gly administration during the  
518 immunization protocol (data not shown).

519 The vaginal tissues taken at necropsy were analyzed by immunohistochemistry. In both  
520 groups of macaques, we demonstrated the presence of organized lymphoid follicles,  
521 composed of B- and T-cells located close to CD31<sup>+</sup> endothelial cells (**Figures 7B-C**).  
522 However, in IL-7-treated DT-immunized macaques, these structures were both more  
523 numerous (11±2, 23±4, 16±2 follicles/50mm<sup>2</sup> of tissue in IL-7-treated macaques and 8±2,  
524 8±1, 6±1 follicles/50mm<sup>2</sup> of tissue in control macaques; p<0.05; **Figure 7D**) and enriched in  
525 B lymphocytes (27±2%, 22±3%, 25±4% of B-cells in follicles of the IL-7-treated macaques  
526 and 20±5%, 11±4%, 16±3% of B-cells in follicles of the control macaques; p<0.05; **Figure**  
527 **7E**), suggesting that their generation/maintenance was dependent on IL-7 stimulation.

528 In these follicles, PNAd<sup>+</sup> (peripheral node addressin) high endothelial venule cells (**Figures**  
529 **7F-G**, top panels) and GL-7<sup>+</sup> T-cells were also in greater numbers (**Figures 7F-G**, middle  
530 panels). Interestingly, GL7<sup>+</sup> B-cells were almost absent from the B cell zones, indicating  
531 follicles without organized germinal centers. However, while the vast majority of cycling  
532 (Ki-67<sup>+</sup>) cells were T-cells in macaques immunized with DT alone, both T- and B-cells were  
533 similarly cycling in the follicles of IL-7-treated DT-immunized macaques, suggesting  
534 ongoing local B-cell responses (**Figures 7F-G**, bottom panels, and **Supplementary Figure**  
535 **5**, arrows indicate Ki-67<sup>+</sup> B-cells).

536 Therefore, the pronounced increase in CCL19, CCL21, CXCL12 and CXCL13, together  
537 with the clustering of B- and T-cells in close proximity to endothelial cells expressing PNAd  
538 in the vaginal mucosa, indicates that pretreatment with rs-IL-7gly induces the formation of

539 ectopic tertiary lymphoid follicles, which probably participate in the development of a  
540 stronger mucosal IgA immune response to DT.

## 541 **DISCUSSION**

542 Similarly to what was observed in macaques subjected to systemic treatment with IL-7 (28),  
543 we demonstrated that local administration of rs-IL-7gly, either injected into or sprayed onto  
544 the vaginal mucosa leads to local expression of a large array of chemokines within 48 hours  
545 following treatment. However, depending on the tissue responding to IL-7 (i.e. skin,  
546 intestine, lungs, vagina), the panel of overexpressed chemokines was different. In the IL-7-  
547 treated vaginal mucosa, 12 chemokines among 19 tested demonstrated increased expression  
548 either at the mRNA or at the protein levels, or both (**Figures 1** and **2**). Interestingly, the  
549 administered dose that was sufficient to drive chemokine expression in the vaginal mucosa  
550 was in the range of local IL-7 concentration observed in the ileum of acutely SIV-infected  
551 rhesus macaques (25) and after systemic injection of radiolabeled IL-7 to macaques  
552 (Cytheris S.A., now Revimmune Inc., personal communication).

553 Some of these chemokines (i.e. CCL2, CCL5, CCL17, CCL20, CXCL10 and CXCL12) are  
554 constitutively produced by cells of the FGT and participate in baseline immune cell turnover  
555 in the vaginal mucosa (5-8, 10). In contrast, local stimulation by CpG ODN or  $\alpha$ -GalCer  
556 stimulates CCL2, CCL7, CCL19, CCL20, CCL22, CXCL8, CXCL10 or CX<sub>3</sub>CL1  
557 overexpression in various mucosal models of inflammation, leading to the homing of  
558 immune cells into the mucosa (8, 37-39). Additionally, CCL28, which is expressed by  
559 diverse mucosal epithelia and selectively attracts IgA<sup>+</sup> ASCs, is also driving the homing of  
560 antigen-specific cells into the vaginal mucosa (12).

561 However, one cannot exclude that some of these overexpressions of chemokine could also  
562 be indirectly stimulated by cytokines whose expression is triggered by IL-7 stimulation in  
563 the vaginal mucosa. Indeed, we evidenced an increased TSLP mRNA expression in vaginal  
564 biopsies collected after vaginal administration of 10 and 15 $\mu$ g of rs-IL-7gly (Figure S2), this  
565 cytokine being reported to stimulate CCL17 and CCL22 expression by CD11c<sup>+</sup> mDCs (40).

566 Considering the wide range of chemokines that were overexpressed in the vaginal tissue,  
567 one can expect the migration of many immune cell types into this mucosa following IL-7  
568 stimulation. Indeed, CD4<sup>+</sup> and CD8<sup>+</sup> T-cells, B-cells, NK-cells as well as CD11c<sup>+</sup> mDCs  
569 and macrophages were clearly attracted to the vaginal chorion by day 2 following IL-7  
570 administration. Interestingly, while lymphocytes were situated in the entire depth of the  
571 mucosa, most of the APCs, and in particular CD11c<sup>+</sup>DC-SIGN<sup>+</sup> cells, were recruited just  
572 underneath the epithelium (**Figure 3A**). This particular localization could be attributed to  
573 CCL2-dependent recruitment as this chemokine is expressed by squamous vaginal epithelial  
574 cells and more specifically at the basolateral surface of primary endocervical epithelial cells  
575 (41) and, following stimulation with IL-7, was almost exclusively detected in the vaginal  
576 epithelium (**Figure 2**). Similarly, CCL7 and CCL5, which mostly recruit CCR2<sup>+</sup> and CCR5<sup>+</sup>  
577 cells, are also overexpressed in the vaginal epithelial layers of the FGT upon IL-7  
578 stimulation (**Figure 2**), and may contribute to the peculiar localization of APCs in the IL-7-  
579 treated vaginal mucosa (**Figure 3**) (9).

580 In contrast, IL-7 dependent enhancement of CCL19, CXCL12 and CXCL13 was mainly  
581 observed in the vaginal chorion (**Figure 2**), suggesting their role in the recruitment of cells  
582 implicated in the adaptive immune response. Indeed, these chemokines allow the  
583 recruitment of CCR7<sup>+</sup>, CXCR4<sup>+</sup> and CXCR5<sup>+</sup> cells, including naïve B-cells and both CD4<sup>+</sup>  
584 and CD8<sup>+</sup> resting T-cells, which constitute the lymphoid infiltrate that characterized the IL-

585 7-treated mucosa and TLS that we observed in the IL-7-treated immunized macaques  
586 (**Figure 7**).

587 To respond to IL-7, mucosal cells should express the specific receptor for this cytokine, a  
588 heterodimer protein composed of the IL-7R $\alpha$ -chain (CD127) and the  $\gamma$ c-chain (CD132). In  
589 addition to resting T-cells, various non-lymphoid cell types also express the IL-7 receptor  
590 (IL-7R). Indeed, in agreement with the literature that describes CD127 expression on  
591 epithelial and endothelial cells of diverse origins (34, 42-45), we identified, in the vaginal  
592 mucosa, CD127 expression on CD31<sup>+</sup> endothelial cells (**Figure 2**) and, at a lower level,  
593 epithelial cells (**Figure 2D**, panels D1, D2 and D6 and Figure S3B-D). Interestingly, these  
594 cells produce significant levels of CCL2 and CXCL8 following *in vitro* IL-7 stimulation  
595 (46). Similarly, and in contrast with the classically observed down-regulation in T-cells, *in*  
596 *vitro* IL-7 stimulation was able to stimulate the up-regulation of CD127, by human aortic  
597 endothelial cells at the mRNA level (47). In this experimental model, IL-7 stimulation  
598 triggered the expression of CCL2 and cell adhesion molecules (ICAM-1 and VCAM-1) both  
599 at the mRNA level and at the protein level. In addition, an overexpression of CD132, the IL-  
600 7R beta chain, was also documented for endothelial cells of both blood and lymphatic  
601 vessels (48).

602 Finally, we demonstrated that both CD68<sup>+</sup> pro-inflammatory “M1” macrophages and  
603 CD11c<sup>+</sup>CD163<sup>+</sup> cells in the vaginal mucosa express CD127. The latter subset probably  
604 belongs to macrophages with a mixed “M1/M2” phenotype (Figure S3). As in humans,  
605 CD11c<sup>+</sup>CD11b<sup>+</sup>CD14<sup>+</sup> FGT DCs lack CD163 expression (49) while CD1c<sup>-</sup>CD14<sup>+</sup>CD163<sup>+</sup>  
606 FGT APCs expressing lower level of CD11c were classified as macrophages (50). In  
607 addition, in rhesus macaques, both CD68<sup>+</sup> and CD163<sup>+</sup> macrophages were identified in  
608 tissues from the FGT (39). Moreover, CD127 expression was previously reported for mouse  
609 intestinal macrophages (26), human CD68<sup>+</sup> synovial macrophages (44) or human CD68<sup>+</sup>  
610 and CD163<sup>+</sup> macrophages in cardiac ventricular tissues sampled from patients with  
611 myocarditis (51), as well as *in vitro* monocyte-derived human macrophages (52). Similarly,  
612 vaginal CD11c<sup>+</sup> dendritic cells also express CD127 (Figure S3), suggesting that they can  
613 participate in the mucosal response to IL-7 stimulation. In fact, IL-7 responsiveness of  
614 human monocytes, mDC and pDC was previously demonstrated by their capacity to produce  
615 CCL17, CCL22 and TSLP upon *in vitro* IL-7 stimulation (53-55). It is thus possible that  
616 DCs and macrophages, initially attracted in the mucosa, participate in the chemokine  
617 expression we observed in the IL-7 stimulated vagina and contribute to the immune cell  
618 homing into the vagina, in a positive feedback loop.

619 We then took advantage of the increased numbers of immune cells in the IL-7-treated  
620 vaginal mucosae to stimulate an antigen-specific immune response in this mucosa and  
621 clearly demonstrated the efficacy of rs-IL-7gly as an adjuvant to help the development of  
622 anti-DT mucosal antibody responses. In the animals vaccinated after local rs-IL-7gly  
623 stimulation, anti-DT mucosal antibody responses were indeed earlier, stronger and more  
624 persistent than in macaques immunized through administration of DT alone (**Figure 4**).  
625 More importantly, this mucosal immune response was largely composed of locally produced  
626 IgAs, as shown by the almost exclusive presence of DT-specific IgA plasma cells in the  
627 upper vagina and fornix of IL-7-treated DT-immunized macaques (**Figure 5**) and the lack of  
628 systemic IgA response in these macaques (**Figures 5 and 6**). In contrast, rs-IL-7gly  
629 stimulation prior to vaginal immunization allowed for the development of a systemic IgG  
630 response characterized by the presence of DT-specific IgG antibody secreting cells in the  
631 iliac LNs sampled at necropsy and in blood by the second week following primary  
632 immunization (**Figures 5 and 6**). However, DT-specific IgG ASCs were also detected in the

633 iliac LNs of DT-alone immunized macaques, at least 2 weeks after the fourth immunization  
634 (i.e. at necropsy).

635 Interestingly, enhanced mucosal cellular immunity was demonstrated after topical  
636 administration of a modified IL-7 (IL-7 fused to the immunoglobulin Fc fragment - IL7-Fc)  
637 in systemically immunized mice (56). Surprisingly, in this study, native IL-7 was inefficient  
638 to trigger immune cell homing to the vagina. However, in the Choi *et al.* study, the  
639 administered IL-7 was non-glycosylated and administered by simply being deposited on the  
640 vaginal mucosa. It is possible that the velocity given by spray administration in our  
641 experiments allowed a better penetration of the cytokine across the mucus and the epithelial  
642 barrier in the IL-7-treated macaques, leading to improved efficacy. Moreover, we performed  
643 cervico-vaginal lavages before each spray, which could be important in reducing the amount  
644 of mucus at the epithelial surface and could also allow the cytokine to penetrate more easily  
645 into the mucosa.

646 Beside their classical homing function, chemokines such as CCL19, CCL21, CXCL12 and  
647 CXCL13 are also implicated, together with cytokines such as IL-17A (enhanced in IL-7-  
648 treated vaginal mucosa sampled 2 days following the administration of rs-IL-7gly, Figure S2)  
649 in the organization of TLS and germinal center formation (57, 58). At day 2 following rs-IL-  
650 7gly administration, most of the infiltrating immune cells were scattered in the chorion but  
651 lymphoid aggregates composed of T-cells, B-cells and APCs could also be observed in the  
652 vaginal mucosa (**Figure 3A**, bottom panels). However, at this time point, these aggregates,  
653 which did not contain clearly defined T- and B-cell zones, cannot be considered as  
654 organized lymphoid structures. In contrast, we observed such structures in the mucosa of IL-  
655 7-treated monkeys sampled at necropsy and were much less present in control macaques  
656 (**Figure 7D**). In both the upper part of the vaginal walls and the vaginal fornix, lymphoid  
657 follicles organized in distinct T-cell and B-cell areas containing proliferating cells were  
658 often surrounding CD31<sup>+</sup> endothelial cells expressing PNA<sup>+</sup>, a marker that characterizes  
659 high endothelial venules, the portal of entry for T- and B-cells into TLS (**Figure 7**, (59)).  
660 However, at this step, we did not detect clear GL7<sup>+</sup> B-cells in these structures while T-cells  
661 express this marker and proliferate, suggesting antigen-induced local activation.

662 Altogether, these data support the hypothesis that mucosal administration of rs-IL-7gly  
663 induces massive CXCR5<sup>+</sup> cell recruitment at HEVs where PNA<sup>+</sup> and CXCL13 are  
664 expressed and initiates TLS neogenesis within vaginal tissue. High levels of IgAs in the  
665 vaginal secretions are produced by mucosally localized plasma cells as evidenced by reverse  
666 immunohistofluorescent staining. In the vagina of IL-7-treated macaques the mucosal  
667 overexpression of CXCL12 probably plays a role in the infiltration of DT-specific plasma  
668 cells (60, 61).

669 In this study, we showed that, in non-human primates, rs-IL-7gly sprayed in the vaginal  
670 lumen penetrates the mucosa and stimulates CD127<sup>+</sup> intra-mucosal cells to produce a large  
671 array of chemokines that mobilize the mucosal immune system. IL-7 induced chemokine  
672 expression in the vaginal tissue triggers the recruitment of various immune cells, and the  
673 activation of mDCs, allowing for the generation of TLS underneath the vaginal epithelium  
674 and the development of a strong mucosal immune response following subsequent topical  
675 administration of antigen. These data suggest that non-traumatic administration of IL-7  
676 could be used as a mucosal adjuvant to elicit vaginal antibody response and provide a very  
677 promising strategy to provide protection against sexually transmitted infections.



678 **CONFLICT OF INTEREST**

679 The authors declare that the research was conducted in the absence of any commercial or  
680 financial relationships that could be construed as a potential conflict of interest.  
681

682 **AUTHOR CONTRIBUTIONS**

683 MR, SL, SFM, BCdM and AS performed the experiments. MR and RC designed the study  
684 and the experiments. ASDD and MB helped for the setting up of the ELISA. MR, SL, and  
685 RC analyzed and interpreted the data. MR and RC wrote the manuscript. SL, SFM, BCdM,  
686 AS, ASDD, MB, IBV, ACC, RC and MR discussed the results, commented the manuscript  
687 and approved the final version.

688

689 **FUNDING**

690 This work was carried out in partial fulfillment of Sandrine Logerot's PhD thesis at  
691 Université Paris Descartes, Paris, France S.L.'s PhD thesis was supported by a CIFRE  
692 (Convention Industrielle de Formation par la Recherche) fellowship co-funded by the  
693 French government and Cytheris S.A. (now Revimmune Inc.), and by Inserm-ANRS and  
694 Université Paris Descartes.

695 This work was supported by the ANRS (Agence Nationale de Recherches sur le SIDA et les  
696 Hépatites Virales), ANRT (Association Nationale de la Recherche et de la Technologie),  
697 Inserm, CNRS, Univeristé de Paris and Cytheris S.A. (now Revimmune Inc.). The funders  
698 had no role in study design, data collection and analysis, decision to publish, or preparation  
699 of the manuscript.

700

701 **ACKNOWLEDGMENTS**

702 The authors would like to thank Drs. Céline Gommel, Christophe Joubert and Nathalie  
703 Bosquet as well as the staffs of the Institut Pasteur (Paris, France) and Infectious Disease  
704 Models and Innovative Therapies (IDMIT, Fontenay-aux-Roses, France) Primate Centers.  
705 IDMIT was supported by French government "Programme d'Investissements d'Avenir"  
706 (PIA; ANR-11-INBS-0008). The authors greatly acknowledge Maryline Favier, Franck  
707 Letourneur and Pierre Bourdoncle, respectively heads of HistIM (histology and  
708 microdissection platform), GENOM'IC (genomic platform) and IMAG'IC (cell imagery  
709 platform) core facilities of the Institut Cochin. The authors thank Thomas Guilbert from  
710 IMAG'IC platform at the Institut Cochin for writing the routine for ImageJ image analysis  
711 software. The authors acknowledge Cytheris S.A. (now Revimmune Inc.), for providing the  
712 recombinant glycosylated simian IL-7 and Aptar pharma for providing the spray devices.  
713 We would like to thank Paul Belle, English-French Interpreter, for copyediting this article.

714

715 **REFERENCES**

- 716 1. Cuburu N, Kweon MN, Song JH, Hervouet C, Luci C, Sun JB, et al. Sublingual  
717 immunization induces broad-based systemic and mucosal immune responses in mice.  
718 *Vaccine* (2007) 25(51):8598-610. Epub 2007/11/13. doi: 10.1016/j.vaccine.2007.09.073.  
719 PubMed PMID: 17996991.
- 720 2. Czerkinsky C, Holmgren J. Topical immunization strategies. *Mucosal immunology*  
721 (2010) 3(6):545-55. Epub 2010/09/24. doi: 10.1038/mi.2010.55. PubMed PMID: 20861833.

- 722 3. Kozlowski PA, Cu-Uvin S, Neutra MR, Flanigan TP. Comparison of the oral, rectal,  
723 and vaginal immunization routes for induction of antibodies in rectal and genital tract  
724 secretions of women. *Infection and immunity* (1997) 65(4):1387-94. Epub 1997/04/01.  
725 PubMed PMID: 9119478; PubMed Central PMCID: PMC175144.
- 726 4. Kozlowski PA, Williams SB, Lynch RM, Flanigan TP, Patterson RR, Cu-Uvin S, et  
727 al. Differential induction of mucosal and systemic antibody responses in women after nasal,  
728 rectal, or vaginal immunization: influence of the menstrual cycle. *Journal of immunology*  
729 (2002) 169(1):566-74. Epub 2002/06/22. doi: 10.4049/jimmunol.169.1.566. PubMed PMID:  
730 12077289.
- 731 5. Fichorova RN, Anderson DJ. Differential expression of immunobiological mediators  
732 by immortalized human cervical and vaginal epithelial cells. *Biol Reprod* (1999) 60(2):508-  
733 14. Epub 1999/01/23. PubMed PMID: 9916021.
- 734 6. Sharkey DJ, Macpherson AM, Tremellen KP, Robertson SA. Seminal plasma  
735 differentially regulates inflammatory cytokine gene expression in human cervical and  
736 vaginal epithelial cells. *Mol Hum Reprod* (2007) 13(7):491-501. Epub 2007/05/08. doi:  
737 gam028 [pii]  
738 10.1093/molehr/gam028. PubMed PMID: 17483528.
- 739 7. Sathakarn S, Hladik F, Promsong A, Nittayananta W. Vaginal innate immune  
740 mediators are modulated by a water extract of *Houttuynia cordata* Thunb. *BMC Complement*  
741 *Altern Med* (2015) 15:183. Epub 2015/06/17. doi: 10.1186/s12906-015-0701-9  
742 10.1186/s12906-015-0701-9 [pii]. PubMed PMID: 26077233; PubMed Central PMCID:  
743 PMC4466860.
- 744 8. Cremel M, Berlier W, Hamzeh H, Cognasse F, Lawrence P, Genin C, et al.  
745 Characterization of CCL20 secretion by human epithelial vaginal cells: involvement in  
746 Langerhans cell precursor attraction. *Journal of leukocyte biology* (2005) 78(1):158-66.  
747 PubMed PMID: 15831560.
- 748 9. Rancez M, Couedel-Courteille A, Cheynier R. Chemokines at mucosal barriers and  
749 their impact on HIV infection. *Cytokine Growth Factor Rev* (2012) 23(4-5):233-43. Epub  
750 2012/06/26. doi: 10.1016/j.cytogfr.2012.05.010  
751 S1359-6101(12)00037-8 [pii]. PubMed PMID: 22728258.
- 752 10. Wira CR, Rodriguez-Garcia M, Patel MV. The role of sex hormones in immune  
753 protection of the female reproductive tract. *Nature reviews Immunology* (2015) 15(4):217-  
754 30. Epub 2015/03/07. doi: 10.1038/nri3819. PubMed PMID: 25743222; PubMed Central  
755 PMCID: PMC4716657.
- 756 11. Zhou JZ, Way SS, Chen K. Immunology of Uterine and Vaginal Mucosae: (Trends  
757 in Immunology 39, 302-314, 2018). *Trends in immunology* (2018) 39(4):355. Epub  
758 2018/03/14. doi: 10.1016/j.it.2018.02.006. PubMed PMID: 29530651; PubMed Central  
759 PMCID: PMC5880711.
- 760 12. Aldon Y, Kratochvil S, Shattock RJ, McKay PF. Chemokine-Adjuvanted Plasmid  
761 DNA Induces Homing of Antigen-Specific and Non-Antigen-Specific B and T Cells to the  
762 Intestinal and Genital Mucosae. *Journal of immunology* (2020) 204(4):903-13. Epub  
763 2020/01/10. doi: 10.4049/jimmunol.1901184. PubMed PMID: 31915263; PubMed Central  
764 PMCID: PMC6994839.
- 765 13. Kelly KA, Chan AM, Butch A, Darville T. Two different homing pathways  
766 involving integrin beta7 and E-selectin significantly influence trafficking of CD4 cells to the  
767 genital tract following *Chlamydia muridarum* infection. *American journal of reproductive*  
768 *immunology* (2009) 61(6):438-45. Epub 2009/04/28. doi: 10.1111/j.1600-  
769 0897.2009.00704.x. PubMed PMID: 19392981; PubMed Central PMCID: PMC2888875.
- 770 14. Davila SJ, Olive AJ, Starnbach MN. Integrin alpha4beta1 is necessary for CD4+ T  
771 cell-mediated protection against genital *Chlamydia trachomatis* infection. *Journal of*

- 772 *immunology* (2014) 192(9):4284-93. Epub 2014/03/25. doi: 10.4049/jimmunol.1303238.  
773 PubMed PMID: 24659687; PubMed Central PMCID: PMC3995848.
- 774 15. Johansson EL, Rudin A, Wassen L, Holmgren J. Distribution of lymphocytes and  
775 adhesion molecules in human cervix and vagina. *Immunology* (1999) 96(2):272-7. Epub  
776 1999/05/08. doi: 10.1046/j.1365-2567.1999.00675.x. PubMed PMID: 10233705; PubMed  
777 Central PMCID: PMC2326729.
- 778 16. Parr MB, Parr EL. Interferon-gamma up-regulates intercellular adhesion molecule-1  
779 and vascular cell adhesion molecule-1 and recruits lymphocytes into the vagina of immune  
780 mice challenged with herpes simplex virus-2. *Immunology* (2000) 99(4):540-5. Epub  
781 2000/05/03. doi: 10.1046/j.1365-2567.2000.00980.x. PubMed PMID: 10792501; PubMed  
782 Central PMCID: PMC2327183.
- 783 17. Escario A, Gomez Barrio A, Simons Diez B, Escario JA. Immunohistochemical  
784 study of the vaginal inflammatory response in experimental trichomoniasis. *Acta Trop*  
785 (2010) 114(1):22-30. Epub 2009/12/23. doi: 10.1016/j.actatropica.2009.12.002. PubMed  
786 PMID: 20025844.
- 787 18. Bertley FM, Kozlowski PA, Wang SW, Chappelle J, Patel J, Sonuyi O, et al. Control  
788 of simian/human immunodeficiency virus viremia and disease progression after IL-2-  
789 augmented DNA-modified vaccinia virus Ankara nasal vaccination in nonhuman primates.  
790 *Journal of immunology* (2004) 172(6):3745-57. Epub 2004/03/09. doi:  
791 10.4049/jimmunol.172.6.3745. PubMed PMID: 15004179.
- 792 19. Sui Y, Zhu Q, Gagnon S, Dzutsev A, Terabe M, Vaccari M, et al. Innate and  
793 adaptive immune correlates of vaccine and adjuvant-induced control of mucosal  
794 transmission of SIV in macaques. *Proceedings of the National Academy of Sciences of the*  
795 *United States of America* (2010) 107(21):9843-8. Epub 2010/05/12. doi:  
796 10.1073/pnas.0911932107. PubMed PMID: 20457926; PubMed Central PMCID:  
797 PMC2906837.
- 798 20. Toka FN, Pack CD, Rouse BT. Molecular adjuvants for mucosal immunity.  
799 *Immunological reviews* (2004) 199:100-12. Epub 2004/07/06. doi: 10.1111/j.0105-  
800 2896.2004.0147.x. PubMed PMID: 15233729.
- 801 21. Hu K, Luo S, Tong L, Huang X, Jin W, Huang W, et al. CCL19 and CCL28 augment  
802 mucosal and systemic immune responses to HIV-1 gp140 by mobilizing responsive  
803 immunocytes into secondary lymph nodes and mucosal tissue. *Journal of immunology*  
804 (2013) 191(4):1935-47. Epub 2013/07/17. doi: 10.4049/jimmunol.1300120. PubMed PMID:  
805 23858028.
- 806 22. Van Roey GA, Arias MA, Tregoning JS, Rowe G, Shattock RJ. Thymic stromal  
807 lymphopoietin (TSLP) acts as a potent mucosal adjuvant for HIV-1 gp140 vaccination in  
808 mice. *European journal of immunology* (2012) 42(2):353-63. Epub 2011/11/08. doi:  
809 10.1002/eji.201141787. PubMed PMID: 22057556; PubMed Central PMCID:  
810 PMC3378695.
- 811 23. Shin H, Kumamoto Y, Gopinath S, Iwasaki A. CD301b+ dendritic cells stimulate  
812 tissue-resident memory CD8+ T cells to protect against genital HSV-2. *Nat Commun* (2016)  
813 7:13346. Epub 2016/11/09. doi: 10.1038/ncomms13346. PubMed PMID: 27827367;  
814 PubMed Central PMCID: PMC5105190.
- 815 24. Lillard JW, Jr., Boyaka PN, Hedrick JA, Zlotnik A, McGhee JR. Lymphotoxin acts  
816 as an innate mucosal adjuvant. *Journal of immunology* (1999) 162(4):1959-65. Epub  
817 1999/02/11. PubMed PMID: 9973465.
- 818 25. Ponte R, Rancez M, Figueiredo-Morgado S, Dutrieux J, Fabre-Mersseman V,  
819 Charmeteau-de-Muylder B, et al. Acute Simian Immunodeficiency Virus Infection Triggers  
820 Early and Transient Interleukin-7 Production in the Gut, Leading to Enhanced Local  
821 Chemokine Expression and Intestinal Immune Cell Homing. *Frontiers in immunology*

- 822 (2017) 8:588. Epub 2017/06/06. doi: 10.3389/fimmu.2017.00588. PubMed PMID:  
823 28579989; PubMed Central PMCID: PMC5437214.
- 824 26. Zhang W, Du JY, Yu Q, Jin JO. Interleukin-7 produced by intestinal epithelial cells  
825 in response to *Citrobacter rodentium* infection plays a major role in innate immunity against  
826 this pathogen. *Infect Immun* (2015) 83(8):3213-23. Epub 2015/06/03. doi:  
827 10.1128/IAI.00320-15  
828 IAI.00320-15 [pii]. PubMed PMID: 26034215; PubMed Central PMCID: PMC4496619.
- 829 27. Sieling PA, Sakimura L, Uyemura K, Yamamura M, Oliveros J, Nickoloff BJ, et al.  
830 IL-7 in the cell-mediated immune response to a human pathogen. *Journal of immunology*  
831 (1995) 154(6):2775-83. Epub 1995/03/15. PubMed PMID: 7876548.
- 832 28. Beq S, Rozlan S, Gautier D, Parker R, Mersseman V, Schilte C, et al. Injection of  
833 glycosylated recombinant simian IL-7 provokes rapid and massive T-cell homing in rhesus  
834 macaques. *Blood* (2009) 114(4):816-25. PubMed PMID: 19351957.
- 835 29. Cimbro R, Vassena L, Arthos J, Cicala C, Kehrl JH, Park C, et al. IL-7 induces  
836 expression and activation of integrin alpha4beta7 promoting naive T-cell homing to the  
837 intestinal mucosa. *Blood* (2012) 120(13):2610-9. Epub 2012/08/17. doi: 10.1182/blood-  
838 2012-06-434779. PubMed PMID: 22896005; PubMed Central PMCID: PMC3460683.
- 839 30. Meier D, Bornmann C, Chappaz S, Schmutz S, Otten LA, Ceredig R, et al. Ectopic  
840 lymphoid-organ development occurs through interleukin 7-mediated enhanced survival of  
841 lymphoid-tissue-inducer cells. *Immunity* (2007) 26(5):643-54. Epub 2007/05/25. doi:  
842 10.1016/j.immuni.2007.04.009. PubMed PMID: 17521585.
- 843 31. Timmer TC, Baltus B, Vondenhoff M, Huizinga TW, Tak PP, Verweij CL, et al.  
844 Inflammation and ectopic lymphoid structures in rheumatoid arthritis synovial tissues  
845 dissected by genomics technology: identification of the interleukin-7 signaling pathway in  
846 tissues with lymphoid neogenesis. *Arthritis and rheumatism* (2007) 56(8):2492-502. Epub  
847 2007/08/01. doi: 10.1002/art.22748. PubMed PMID: 17665400.
- 848 32. Nayar S, Campos J, Chung MM, Navarro-Nunez L, Chachlani M, Steinthal N, et al.  
849 Bimodal Expansion of the Lymphatic Vessels Is Regulated by the Sequential Expression of  
850 IL-7 and Lymphotoxin alpha1beta2 in Newly Formed Tertiary Lymphoid Structures.  
851 *Journal of immunology* (2016) 197(5):1957-67. Epub 2016/07/31. doi:  
852 10.4049/jimmunol.1500686. PubMed PMID: 27474071; PubMed Central PMCID:  
853 PMC4991245.
- 854 33. Ciccica F, Rizzo A, Maugeri R, Alessandro R, Croci S, Guggino G, et al. Ectopic  
855 expression of CXCL13, BAFF, APRIL and LT-beta is associated with artery tertiary  
856 lymphoid organs in giant cell arteritis. *Annals of the rheumatic diseases* (2017) 76(1):235-  
857 43. Epub 2016/04/22. doi: 10.1136/annrheumdis-2016-209217. PubMed PMID: 27098405.
- 858 34. Al-Rawi MA, Watkins G, Mansel RE, Jiang WG. The effects of interleukin-7 on the  
859 lymphangiogenic properties of human endothelial cells. *Int J Oncol* (2005) 27(3):721-30.  
860 Epub 2005/08/04. PubMed PMID: 16077922.
- 861 35. Sereti I, Dunham RM, Spritzler J, Aga E, Proschan MA, Medvik K, et al. IL-7  
862 administration drives T cell-cycle entry and expansion in HIV-1 infection. *Blood* (2009)  
863 113(25):6304-14. Epub 2009/04/22. doi: 10.1182/blood-2008-10-186601. PubMed PMID:  
864 19380868; PubMed Central PMCID: PMC2710926.
- 865 36. Ribeiro Dos Santos P, Rancez M, Pretet JL, Michel-Salzat A, Messent V, Bogdanova  
866 A, et al. Rapid dissemination of SIV follows multisite entry after rectal inoculation. *PLoS*  
867 *One* (2011) 6(5):e19493. Epub 2011/05/17. doi: 10.1371/journal.pone.0019493  
868 PONE-D-10-04131 [pii]. PubMed PMID: 21573012; PubMed Central PMCID:  
869 PMC3090405.



- 870 37. Lindqvist M, Navabi N, Jansson M, Samuelson E, Sjoling A, Orndal C, et al. Local  
871 cytokine and inflammatory responses to candidate vaginal adjuvants in mice. *Vaccine*  
872 (2009) 28(1):270-8. Epub 2009/10/06. doi: 10.1016/j.vaccine.2009.09.083  
873 S0264-410X(09)01430-3 [pii]. PubMed PMID: 19800444.
- 874 38. Schenkel JM, Fraser KA, Vezys V, Masopust D. Sensing and alarm function of  
875 resident memory CD8(+) T cells. *Nature immunology* (2013) 14(5):509-13. Epub  
876 2013/04/02. doi: 10.1038/ni.2568. PubMed PMID: 23542740; PubMed Central PMCID:  
877 PMC3631432.
- 878 39. Shang L, Duan L, Perkey KE, Wietgreffe S, Zupancic M, Smith AJ, et al. Epithelium-  
879 innate immune cell axis in mucosal responses to SIV. *Mucosal immunology* (2017)  
880 10(2):508-19. Epub 2016/07/21. doi: 10.1038/mi.2016.62. PubMed PMID: 27435105;  
881 PubMed Central PMCID: PMC5250613.
- 882 40. Fontenot D, He H, Hanabuchi S, Nehete PN, Zhang M, Chang M, et al. TSLP  
883 production by epithelial cells exposed to immunodeficiency virus triggers DC-mediated  
884 mucosal infection of CD4+ T cells. *Proc Natl Acad Sci U S A* (2009) 106(39):16776-81.  
885 Epub 2009/10/07. doi: 10.1073/pnas.0907347106  
886 0907347106 [pii]. PubMed PMID: 19805372; PubMed Central PMCID: PMC2757857.
- 887 41. Fahey JV, Schaefer TM, Channon JY, Wira CR. Secretion of cytokines and  
888 chemokines by polarized human epithelial cells from the female reproductive tract. *Hum*  
889 *Reprod* (2005) 20(6):1439-46. Epub 2005/03/01. doi: deh806 [pii]  
890 10.1093/humrep/deh806. PubMed PMID: 15734755.
- 891 42. Reinecker HC, Podolsky DK. Human intestinal epithelial cells express functional  
892 cytokine receptors sharing the common gamma c chain of the interleukin 2 receptor. *Proc*  
893 *Natl Acad Sci U S A* (1995) 92(18):8353-7. Epub 1995/08/29. PubMed PMID: 7667294;  
894 PubMed Central PMCID: PMC41155.
- 895 43. Dus D, Krawczenko A, Zalecki P, Paprocka M, Wiedlocha A, Goupille C, et al. IL-7  
896 receptor is present on human microvascular endothelial cells. *Immunol Lett* (2003)  
897 86(2):163-8. Epub 2003/03/20. doi: S016524780300018X [pii]. PubMed PMID: 12644318.
- 898 44. Pickens SR, Chamberlain ND, Volin MV, Pope RM, Talarico NE, Mandelin AM,  
899 2nd, et al. Characterization of interleukin-7 and interleukin-7 receptor in the pathogenesis of  
900 rheumatoid arthritis. *Arthritis Rheum* (2011) 63(10):2884-93. Epub 2011/06/08. doi:  
901 10.1002/art.30493. PubMed PMID: 21647866; PubMed Central PMCID: PMC3614067.
- 902 45. Liao B, Cao PP, Zeng M, Zhen Z, Wang H, Zhang YN, et al. Interaction of thymic  
903 stromal lymphopoietin, IL-33, and their receptors in epithelial cells in eosinophilic chronic  
904 rhinosinusitis with nasal polyps. *Allergy* (2015) 70(9):1169-80. Epub 2015/06/23. doi:  
905 10.1111/all.12667. PubMed PMID: 26095319.
- 906 46. Elner VM, Elner SG, Standiford TJ, Lukacs NW, Strieter RM, Kunkel SL.  
907 Interleukin-7 (IL-7) induces retinal pigment epithelial cell MCP-1 and IL-8. *Exp Eye Res*  
908 (1996) 63(3):297-303. Epub 1996/09/01. doi: S0014-4835(96)90118-9 [pii]  
909 10.1006/exer.1996.0118. PubMed PMID: 8943702.
- 910 47. Li R, Paul A, Ko KW, Sheldon M, Rich BE, Terashima T, et al. Interleukin-7  
911 induces recruitment of monocytes/macrophages to endothelium. *Eur Heart J* (2012)  
912 33(24):3114-23. Epub 2011/08/02. doi: 10.1093/eurheartj/ehr245  
913 ehr245 [pii]. PubMed PMID: 21804111; PubMed Central PMCID: PMC3598429.
- 914 48. Iolyeva M, Aebischer D, Proulx ST, Willrodt AH, Ecoiffier T, Haner S, et al.  
915 Interleukin-7 is produced by afferent lymphatic vessels and supports lymphatic drainage.  
916 *Blood* (2013) 122(13):2271-81. Epub 2013/08/22. doi: 10.1182/blood-2013-01-478073  
917 blood-2013-01-478073 [pii]. PubMed PMID: 23963040; PubMed Central PMCID:  
918 PMC3952712.

- 919 49. Rodriguez-Garcia M, Shen Z, Barr FD, Boesch AW, Ackerman ME, Kappes JC, et  
920 al. Dendritic cells from the human female reproductive tract rapidly capture and respond to  
921 HIV. *Mucosal immunology* (2017) 10(2):531-44. Epub 2016/09/01. doi:  
922 10.1038/mi.2016.72. PubMed PMID: 27579858; PubMed Central PMCID: PMC5332537.
- 923 50. Duluc D, Gannevat J, Anguiano E, Zurawski S, Carley M, Boreham M, et al.  
924 Functional diversity of human vaginal APC subsets in directing T-cell responses. *Mucosal*  
925 *immunology* (2013) 6(3):626-38. Epub 2012/11/08. doi: 10.1038/mi.2012.104. PubMed  
926 PMID: 23131784; PubMed Central PMCID: PMC3568194.
- 927 51. Kubin N, Richter M, Sen-Hild B, Akinturk H, Schonburg M, Kubin T, et al.  
928 Macrophages represent the major pool of IL-7Ralpha expressing cells in patients with  
929 myocarditis. *Cytokine* (2020) 130:155053. Epub 2020/03/24. doi:  
930 10.1016/j.cyto.2020.155053. PubMed PMID: 32203694.
- 931 52. Zhang M, Drenkow J, Lankford CS, Frucht DM, Rabin RL, Gingeras TR, et al. HIV  
932 regulation of the IL-7R: a viral mechanism for enhancing HIV-1 replication in human  
933 macrophages in vitro. *Journal of leukocyte biology* (2006) 79(6):1328-38. Epub 2006/04/15.  
934 doi: jlb.0704424 [pii]  
935 10.1189/jlb.0704424. PubMed PMID: 16614257.
- 936 53. McKay FC, Hoe E, Parnell G, Gatt P, Schibeci SD, Stewart GJ, et al. IL7Ralpha  
937 expression and upregulation by IFNbeta in dendritic cell subsets is haplotype-dependent.  
938 *PLoS One* (2013) 8(10):e77508. Epub 2013/10/23. doi: 10.1371/journal.pone.0077508  
939 PONE-D-12-30789 [pii]. PubMed PMID: 24147013; PubMed Central PMCID:  
940 PMC3797747.
- 941 54. Reche PA, Soumelis V, Gorman DM, Clifford T, Liu M, Travis M, et al. Human  
942 thymic stromal lymphopoietin preferentially stimulates myeloid cells. *Journal of*  
943 *immunology* (2001) 167(1):336-43. Epub 2001/06/22. doi: 10.4049/jimmunol.167.1.336.  
944 PubMed PMID: 11418668.
- 945 55. Vulcano M, Albanesi C, Stoppacciaro A, Bagnati R, D'Amico G, Struyf S, et al.  
946 Dendritic cells as a major source of macrophage-derived chemokine/CCL22 in vitro and in  
947 vivo. *European journal of immunology* (2001) 31(3):812-22. Epub 2001/03/10. doi:  
948 10.1002/1521-4141(200103)31:3<812::AID-IMMU812>3.0.CO;2-L [pii]  
949 10.1002/1521-4141(200103)31:3&#60;812::AID-IMMU812&#62;3.0.CO;2-L. PubMed  
950 PMID: 11241286.
- 951 56. Choi YW, Kang MC, Seo YB, Namkoong H, Park Y, Choi DH, et al. Intravaginal  
952 Administration of Fc-Fused IL7 Suppresses the Cervicovaginal Tumor by Recruiting HPV  
953 DNA Vaccine-Induced CD8 T Cells. *Clin Cancer Res* (2016) 22(23):5898-908. Epub  
954 2016/07/14. doi: 10.1158/1078-0432.CCR-16-0423. PubMed PMID: 27407095.
- 955 57. Jones GW, Jones SA. Ectopic lymphoid follicles: inducible centres for generating  
956 antigen-specific immune responses within tissues. *Immunology* (2016) 147(2):141-51. Epub  
957 2015/11/10. doi: 10.1111/imm.12554. PubMed PMID: 26551738; PubMed Central PMCID:  
958 PMC4717241.
- 959 58. Luo S, Zhu R, Yu T, Fan H, Hu Y, Mohanta SK, et al. Chronic Inflammation: A  
960 Common Promoter in Tertiary Lymphoid Organ Neogenesis. *Frontiers in immunology*  
961 (2019) 10:2938. Epub 2020/01/11. doi: 10.3389/fimmu.2019.02938. PubMed PMID:  
962 31921189; PubMed Central PMCID: PMC6930186.
- 963 59. Ruddle NH. High Endothelial Venules and Lymphatic Vessels in Tertiary Lymphoid  
964 Organs: Characteristics, Functions, and Regulation. *Frontiers in immunology* (2016) 7:491.  
965 Epub 2016/11/25. doi: 10.3389/fimmu.2016.00491. PubMed PMID: 27881983; PubMed  
966 Central PMCID: PMC5101196.
- 967 60. Hargreaves DC, Hyman PL, Lu TT, Ngo VN, Bidgol A, Suzuki G, et al. A  
968 coordinated change in chemokine responsiveness guides plasma cell movements. *The*

969 *Journal of experimental medicine* (2001) 194(1):45-56. Epub 2001/07/04. doi:  
970 10.1084/jem.194.1.45. PubMed PMID: 11435471; PubMed Central PMCID: PMC2193440.  
971 61. Hiepe F, Radbruch A. Plasma cells as an innovative target in autoimmune disease  
972 with renal manifestations. *Nat Rev Nephrol* (2016) 12(4):232-40. Epub 2016/03/01. doi:  
973 10.1038/nrneph.2016.20. PubMed PMID: 26923204.  
974  
975

976 **FIGURE LEGENDS**

977 **Figure 1. Topical administration of rs-IL-7gly induces local chemokine transcription in**  
978 **the vaginal mucosa**

979 (A) mRNAs coding for CCL5, CCL19, CCL28, CXCL8, CXCL10 and CXCL12 were  
980 quantified in vaginal biopsies (2-4 biopsies per macaque) sampled 24 hours or 48 hours after  
981 rs-IL-7gly-injection (IL-7 24h, dark gray bars, n=5 macaques; IL-7 48h, black bars, n=3  
982 macaques), 24 and 48 hours after injection with Indian ink alone (Ink, light gray bars, n=8  
983 macaques) and from non-injected healthy rhesus macaques (ni, white bars, n=9). Data were  
984 normalized to HPRT mRNAs simultaneously quantified together with the chemokines  
985 (Chemokine mRNA copies/HPRT mRNA copy). Bars and error bars represent means and  
986 SEM, respectively. ##:  $p < 0.01$ , #:  $0.01 < p < 0.05$  (one-tailed Mann-Whitney U test). (B)  
987 mRNAs coding for CCL5, CCL19, CCL28, CXCL8, CXCL10 and CXCL12 were  
988 quantified in pluristratified epithelium (EP) or chorion (CH) microdissected from vaginal  
989 biopsies sampled 48 hours after rs-IL-7gly administration (n=3 macaques). Each symbol  
990 represents one macaque (6-9 microdissected zones per macaque), and horizontal black bars  
991 represent means. #:  $p < 0.05$  (Mann-Whitney U test). (C) mRNAs coding for 19 chemokines  
992 were quantified in vaginal biopsies (4 biopsies per macaque) sampled from macaques one  
993 month before (PRE, n=5) and 48<sup>H</sup> after the administration of 10 $\mu$ g (n=3) or 15 $\mu$ g (n=2) of  
994 rs-IL-7gly (POST), by vaginal spray. Data were normalized to HPRT mRNAs  
995 simultaneously quantified together with the chemokines (Chemokine mRNA copies/HPRT  
996 mRNA copy). Each point represents the mean value obtained for the 5 macaques at each  
997 time point. \*:  $p < 0.05$  (Wilcoxon Signed-Rank Test).

998

999 **Figure 2. Topical administration of rs-IL-7gly increases local chemokine expression in**  
1000 **the vaginal mucosa**

1001 (A) Sections of vaginal mucosa biopsies sampled 30 days before (Ctrl), or 2 days after (IL-7  
1002 48<sup>H</sup>) the administration of 10 $\mu$ g of rs-IL-7gly by vaginal spray were immunostained with  
1003 anti-CCL5 or -CCL19 (red) antibodies, in combination with anti-CXCL12 or -CCL7 (green)  
1004 antibodies, and anti-CCL2 or -CXCL13 (green) antibodies. Nuclei were stained with DAPI  
1005 (blue). EP: *Pluristratified Epithelium*. (B, C) The expression of CCL2, CCL5, CCL7,  
1006 CCL19, CXCL12 and CXCL13 was quantified by image analysis of  
1007 immunohistofluorescent staining. Data are expressed as percentages of total chorion (B) or  
1008 the epithelium (C) surface labeled by the different antibodies. Each bar represents the mean  
1009  $\pm$  SEM of quantifications performed on 5-8 macaques (2-3 biopsies per animal) sampled 30  
1010 days before (Ctrl, white bars) and 48 hours after (IL-7 48<sup>H</sup>, black bars) the administration of  
1011 10 $\mu$ g of rs-IL-7gly. Statistical significance of the differences between IL-7 treated and  
1012 control animals are shown at the top of the figure (Mann-Whitney U test). (D) Sections of  
1013 vaginal mucosa were labeled with anti-CD127 and combinations of anti-CD3, anti-  
1014 MamuLa-DR, anti-CD11c, anti-CD163, anti-CD68, anti-CD31 and anti- $\alpha$ SMA antibodies.  
1015 Nuclei were stained with DAPI (grey). *Green arrowheads identify CD127<sup>+</sup>CD3<sup>-</sup>MamuLa-*  
1016 *DR<sup>-</sup> cells; Red arrows identify CD127<sup>+</sup>CD11c<sup>+</sup>MamuLa-DR<sup>-</sup> cells; Yellow arrows identify:*  
1017 *CD127<sup>+</sup>CD11c<sup>+</sup>MamuLa-DR<sup>+</sup> (D2), CD127<sup>+</sup>CD11c<sup>+</sup>CD163<sup>+</sup> (D3), or*  
1018 *CD127<sup>+</sup>CD11c<sup>+</sup>CD68<sup>+</sup> (D4) triple positive cells; White arrowheads identify CD127<sup>+</sup>CD31<sup>+</sup>*  
1019 *endothelial cells. EP: Pluristratified Epithelium; Ch: Chorion; DR: MHC-II MamuLa-DR.*

1020

1021 **Figure 3. Topical administration of rs-IL-7gly induces the recruitment of immune cells**  
1022 **into the vaginal chorion**

1023 (A) Sections of vaginal mucosa biopsies sampled 30 days before (Ctrl), or 48 hours after  
1024 (IL-7 48<sup>H</sup>) the administration of 10µg of rs-IL-7gly by vaginal spray were labeled with anti-  
1025 CD3, -CD11c, -PM-2K and -CD20 antibodies, in combination with anti-CD4, -CD8, -DC-  
1026 SIGN, -CD20 or -MHC-II MamuLa-DR antibodies. Nuclei were stained with DAPI (blue).  
1027 (B, C) Cell infiltration was quantified by image analysis of immunohistofluorescent staining  
1028 and expressed as numbers of cells per mm<sup>2</sup> of chorion. Each bar represents the mean ± SEM  
1029 of quantifications performed on 5-8 macaques (2-3 biopsies per animal) sampled 30 days  
1030 before (Ctrl, white bars) and 48 hours after (IL-7 48<sup>H</sup>, black bars) the administration of 10µg  
1031 of rs-IL-7gly. (D) Sections of vaginal mucosa biopsies sampled 30 days before (Ctrl), or 48  
1032 hours after (IL-7) the administration of 10µg of rs-IL-7gly by vaginal spray were labeled  
1033 with anti-CD11c (green) and anti-CD83 (red) antibodies. Nuclei were stained with DAPI  
1034 (blue). Arrows identify CD11c<sup>+</sup>CD83<sup>+</sup> mature myeloid dendritic cells. CD11c<sup>+</sup>CD83<sup>+</sup> cells  
1035 were quantified by image analysis of immunohistofluorescent staining on vaginal mucosa  
1036 biopsies sampled from macaques (n=4) 30 days before (Ctrl, white bars) and 48 hours after  
1037 (IL-7 48<sup>H</sup>, black bars) the administration of 10µg of rs-IL-7gly and expressed as number of  
1038 double positive cells per mm<sup>2</sup> of chorion ± SEM (E) and as the frequency of CD83<sup>+</sup> cells in  
1039 CD11c<sup>+</sup> cells (F). (G) Sections of vaginal mucosa biopsies sampled 30 days before (Ctrl), or  
1040 48 hours after (IL-7) the administration of 10µg of rs-IL-7gly by vaginal spray were  
1041 immunostained with anti-MamuLa-DR antibodies (green). Nuclei were stained with DAPI  
1042 (blue). (H) MamuLa-DR<sup>+</sup> cells were quantified by image analysis of  
1043 immunohistofluorescent staining on vaginal mucosa biopsies sampled from macaques (n=7)  
1044 30 days before (Ctrl, white bars) and 48 hours after (IL-7 48<sup>H</sup>, black bars) the administration  
1045 of 10µg of rs-IL-7gly. \*\*: p<0.01, \*: 0.01<p<0.05 (Mann-Whitney U test). EP:  
1046 *Pluristratified Epithelium*; DR: *MHC-II MamuLa-DR*.

1047

1048 **Figure 4. Topical administration of DT leads to a stronger mucosal immune response**  
1049 **after local administration of rs-IL-7gly.**

1050 Specific anti-DT IgGs (A, C) and IgAs (B, D), were quantified by ELISA in vaginal  
1051 secretions of 6 rhesus macaques that received vaginal administration of either 10µg of rs-IL-  
1052 7gly (black bars; n=3) or PBS (white bars, n=3), followed, at day 2 (D2), by local  
1053 administration of Diphtheria Toxoid (DT). Two boosts were performed at 16 and 31 weeks  
1054 following prime immunization, using the same protocol. All administrations were performed  
1055 by vaginal spray. Specific anti-DT antibody responses are expressed as optical density over  
1056 IgG or IgA concentration in each CVL sample. Bars and error bars represent means and  
1057 SEM at any time-point for the 3 animals from each group. Samples containing blood  
1058 contaminations due to menstruations were excluded. Statistical differences between IL-7-  
1059 treated and untreated monkeys are shown (MANOVA Test). D0: *Administration of rs-IL-*  
1060 *7gly or PBS*; D2: *Administration of DT*; W: *Week post-DT administration*.

1061

1062 **Figure 5. Preferential localization of DT specific IgAs plasma cells in the vaginal**  
1063 **mucosa following rs-IL-7gly-adjuvanted mucosal immunization.**

1064 Sections of vaginal mucosa (A), or iliac lymph nodes (B), sampled at necropsy (i.e. 2 weeks  
1065 after the fourth mucosal immunization) from PBS+DT (top panels) and IL-7+DT (bottom  
1066 panels) -immunized macaques, were incubated with DT and immunostained with anti-DT  
1067 antibodies (green) and either anti-IgA or anti-IgG (red) antibodies to reveal IgA and IgG  
1068 anti-DT plasma cells, respectively. Nuclei were stained with DAPI (blue). Representative  
1069 examples of the upper part of the vagina (A, left panels) and vaginal fornix (A, right panels)  
1070 or of the draining lymph nodes (B) are shown. DT-specific plasma cells are yellow (A, B)



1071 and arrows indicate DT-specific IgA plasma cells in vaginal mucosa (A). *EP: Pluristratified*  
1072 *Epithelium; Ch: Chorion.* (C, D) IgG- and IgA-producing DT-specific plasma cells (ASC)  
1073 were quantified by B-cell ELISPOT on isolated cells from the vaginal chorion of macaques  
1074 immunized with PBS+DT (White bars, n=1) or IL-7+DT (Black bars, n=1), sampled at  
1075 necropsy (C), and on isolated cells from iliac lymph nodes from macaques immunized with  
1076 PBS+DT (White bars, n=3) or IL-7+DT (Black bars, n=3), sampled at necropsy (D). Results  
1077 are expressed as IgG or IgA anti-DT-specific plasma cells per  $10^6$  cells. Bars and error bars  
1078 represent means and SEM, respectively (two independent experiments performed in  
1079 duplicate; \*:  $p < 0.05$  (Mann-Whitney U test)). *LN: Lymph nodes; ASC: antibody secreting*  
1080 *cells.*

1081

1082 **Figure 6. Increased numbers of circulating DT-specific IgG antibody-secreting cells**  
1083 **after rs-IL-7gly-adjuvanted vaginal immunization.**

1084 DT-specific ASC of IgG (A) and IgA (B) isotypes were quantified by B-cell ELISPOT on  
1085 peripheral blood mononuclear cells (PBMCs) from PBS+DT (White bars, n=3) and IL-  
1086 7+DT (Black bars, n=3) immunized macaques sampled after prime immunization (plain  
1087 bars) or after boost #1 (dotted bars) or boost #2 (hatched bars). Results are expressed as the  
1088 number of IgG or IgA anti-DT-specific cells per  $10^6$  PBMC. Bars and error bars represent  
1089 means and SEM obtained in two independent experiments performed in duplicate. Statistical  
1090 differences between IL-7-treated and PBS-treated immunized monkeys are shown  
1091 (MANOVA Test). *ND: Not determined.*

1092

1093 **Figure 7. Induction of ectopic lymphoid follicles in the vaginal mucosa of IL-7-treated**  
1094 **macaques**

1095 (A) mRNAs coding for CCL19, CCL21, CXCL12 and CXCL13 were quantified in vaginal  
1096 biopsies (n=3-4 per macaque) sampled at baseline and at necropsy from IL-7+DT (black  
1097 bars, n=3) and PBS+DT (white bars, n=3) immunized macaques. Data are presented  
1098 normalized to HPRT mRNAs simultaneously quantified together with the chemokines  
1099 (chemokine mRNA copies/HPRT mRNA copy). Bar and error bars represent the fold  
1100 increase over baseline values and SD. Statistical differences between IL-7-treated and PBS-  
1101 treated monkeys are shown (Mann-Whitney U test). (B, C) Sections of vaginal walls (left  
1102 panels) and vaginal fornix (right panels) sampled at necropsy from PBS+DT (B) and IL-  
1103 7+DT (C) immunized macaques were labeled with anti-CD3 (red), anti-CD20 (cyan) and  
1104 anti-CD31 (yellow) antibodies. Nuclei were stained with DAPI (blue). *EP: Pluristratified*  
1105 *Epithelium; Ch: Chorion.* (D, E) Sections (n=8 to 14 sections per macaque) of vaginal  
1106 mucosa gathered from the PBS+DT (white boxes; Mac#1, #2 and #3) and the IL-7+DT  
1107 (black boxes; Mac#4, #5 and #6) immunized macaques at necropsy were immunostained  
1108 with anti-CD3 and anti-CD20 antibodies. The number of lymphoid follicles (D) and the  
1109 percentage of B-cells in each follicle (n=7 to 21 follicles analyzed per macaque) (E) are  
1110 presented as box-plots. Statistical differences between the 2 groups of macaques are shown  
1111 (Mann-Whitney U test). (F, G) Sections of vaginal walls (left panels) and vaginal fornix  
1112 (right panels) gathered from PBS+DT (F) and IL-7+DT (G) immunized macaques sampled  
1113 at necropsy were labeled with anti-CD3 (red) and anti-CD20 (cyan) antibodies in  
1114 combination with anti-PNAd (top panels), anti-GL-7 (middle panels) or anti-Ki-67 (bottom  
1115 panels) (yellow) antibodies. Nuclei were stained with DAPI (blue). Arrows identify Ki-67-  
1116 expressing B-cells.

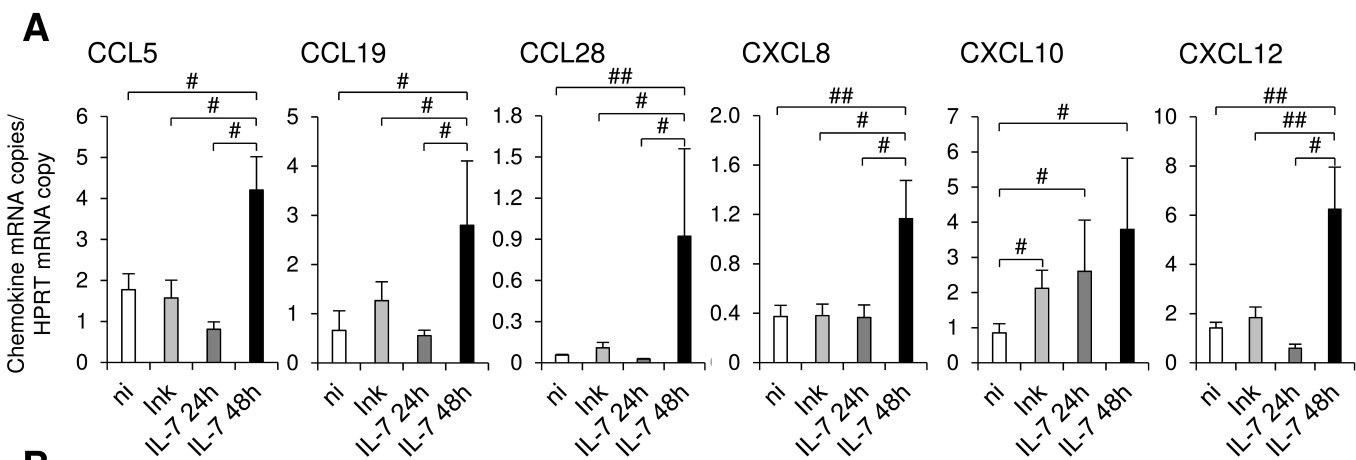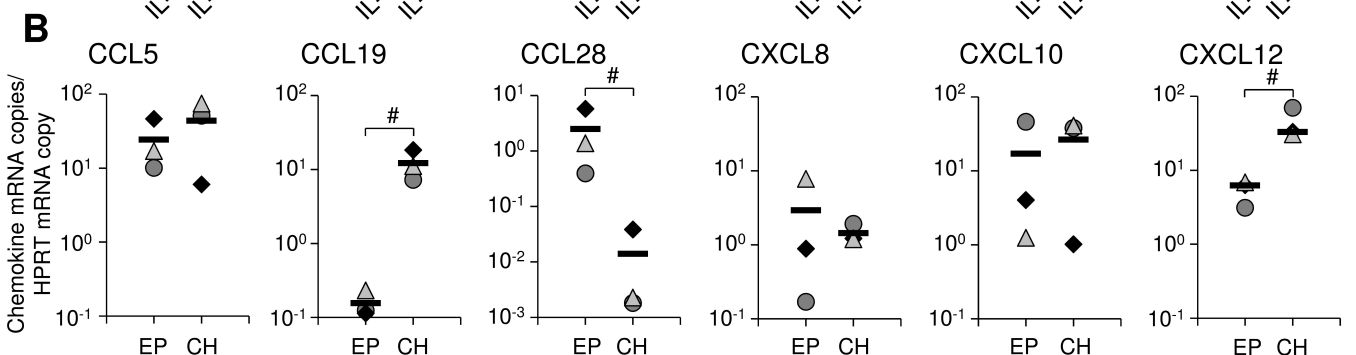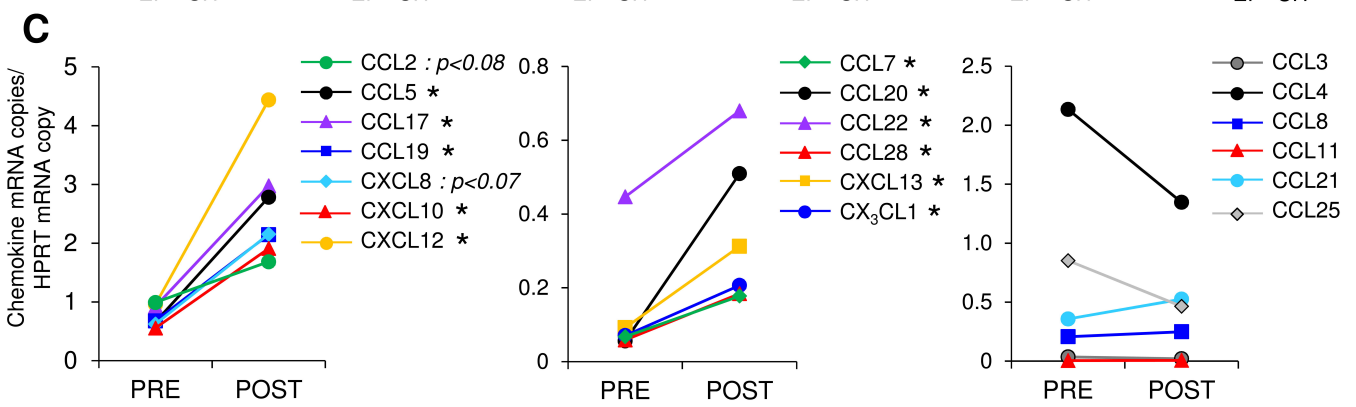

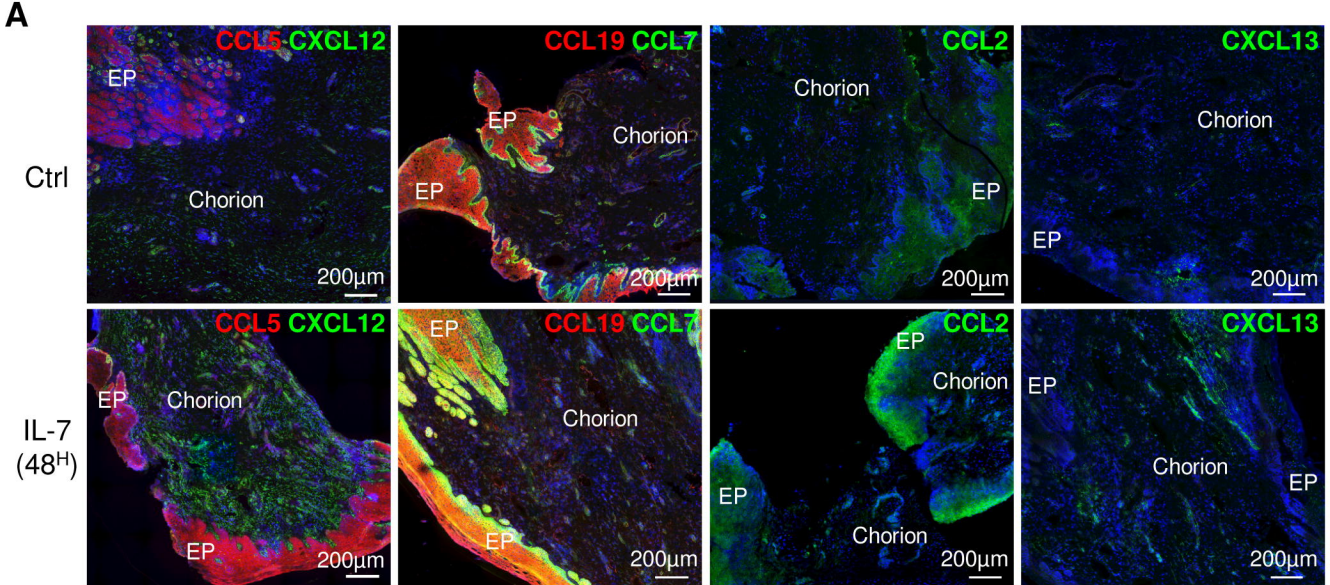

**B - CHORION**

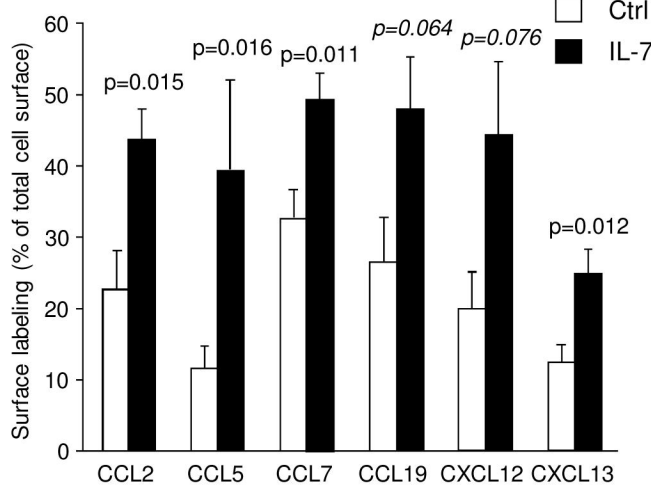

**C - EPITHELIUM**

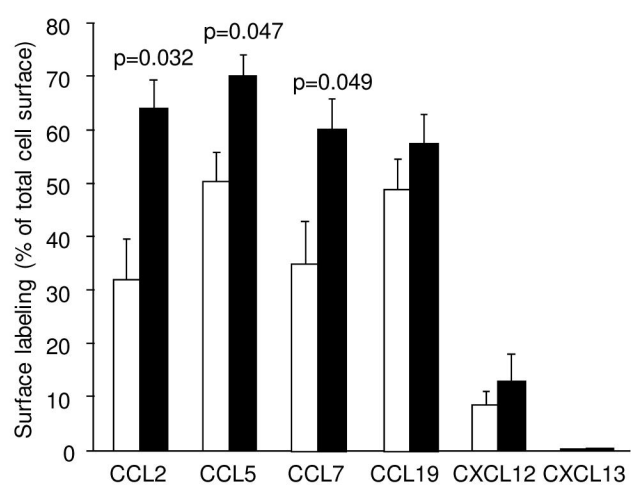

**D**

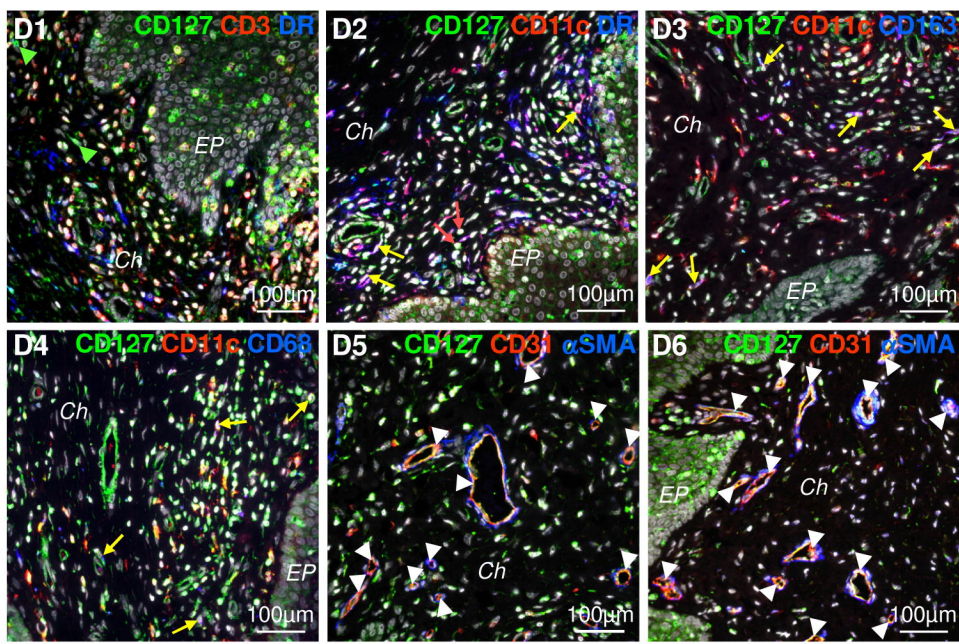



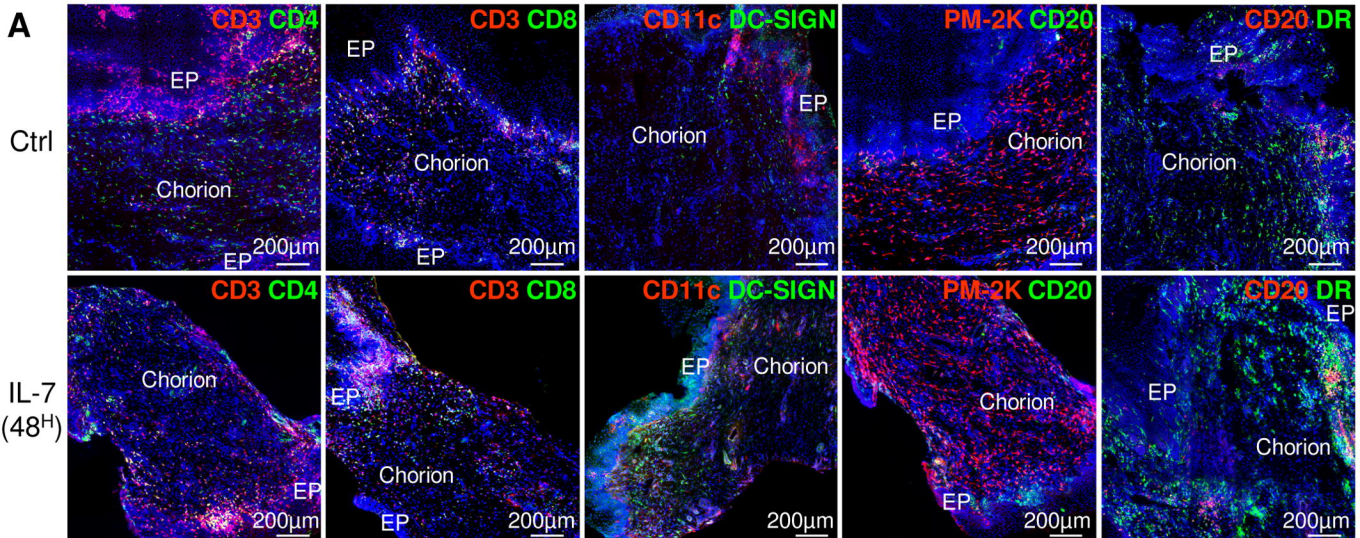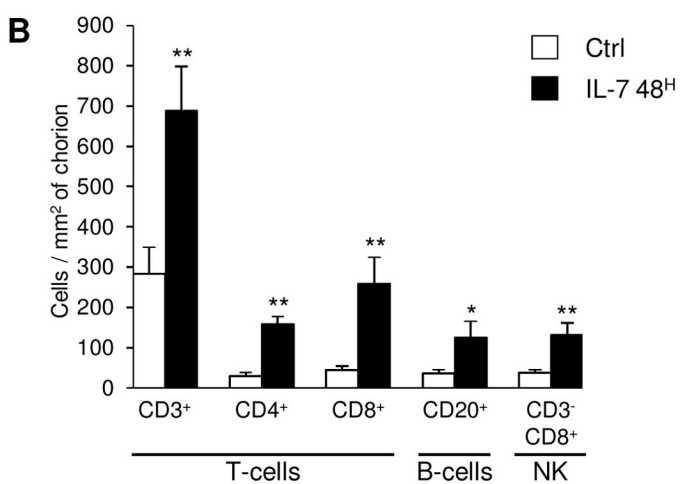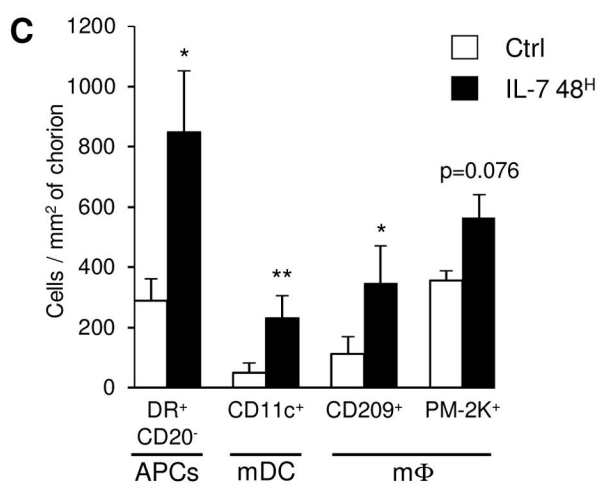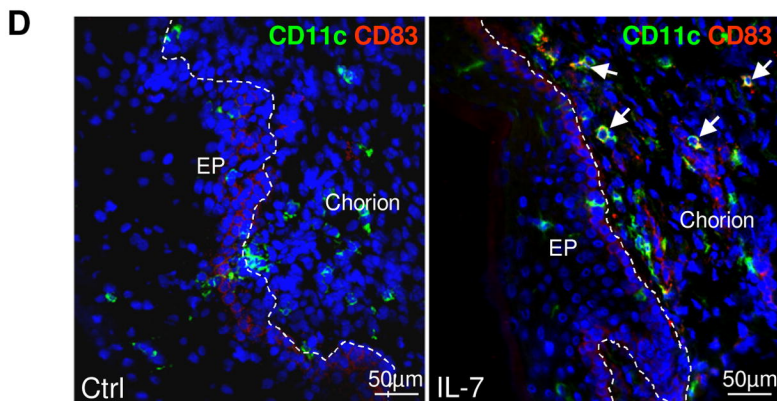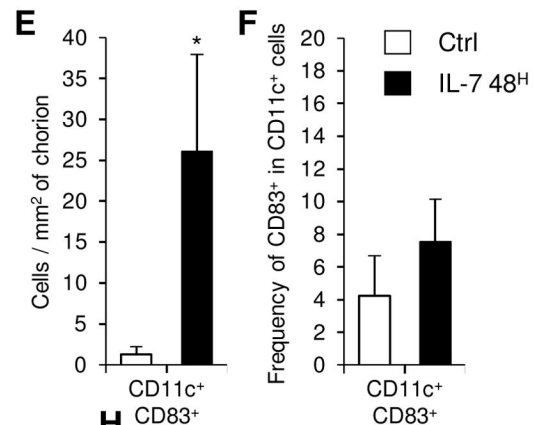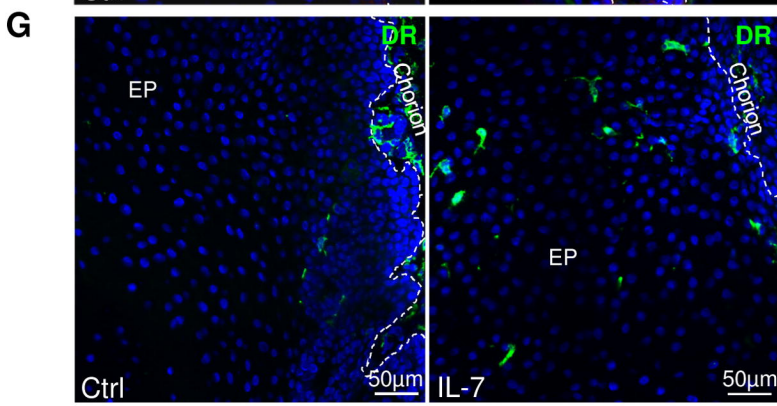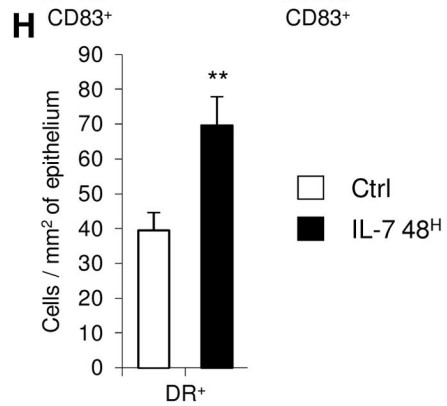

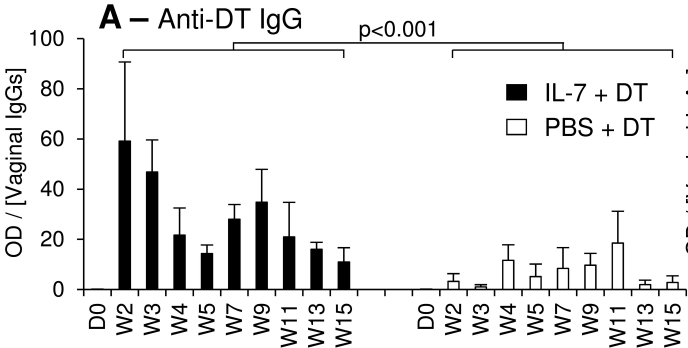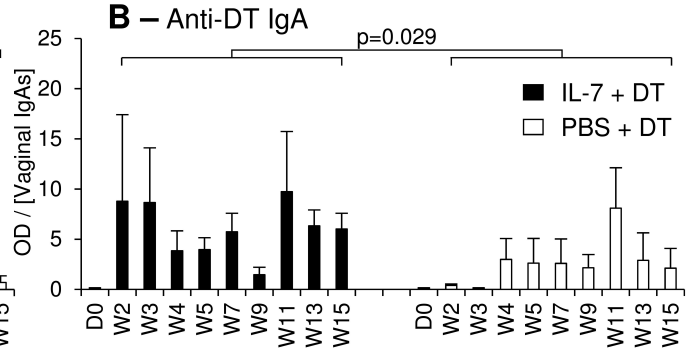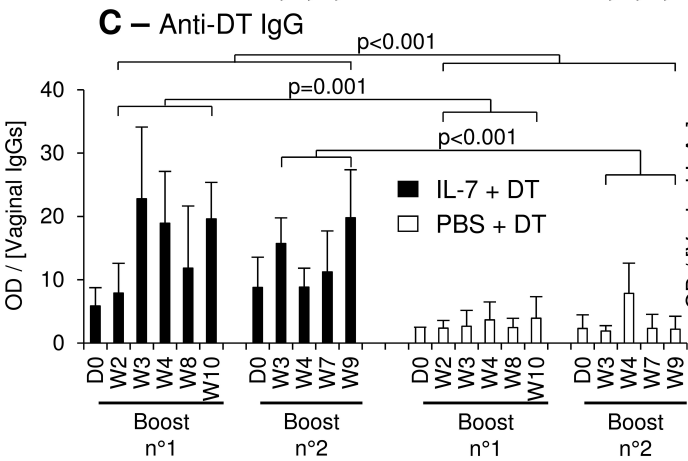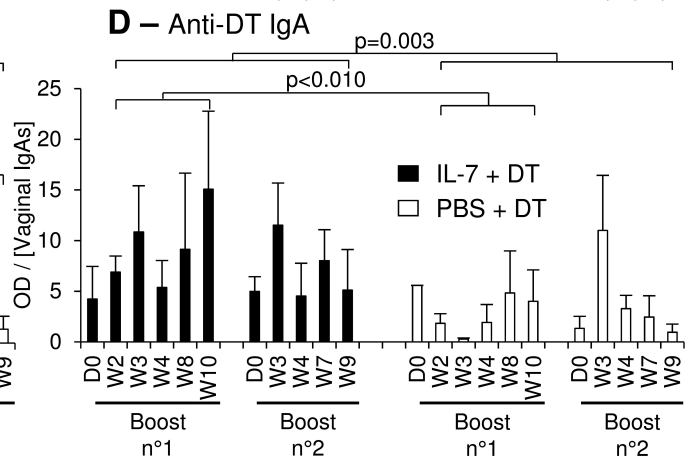



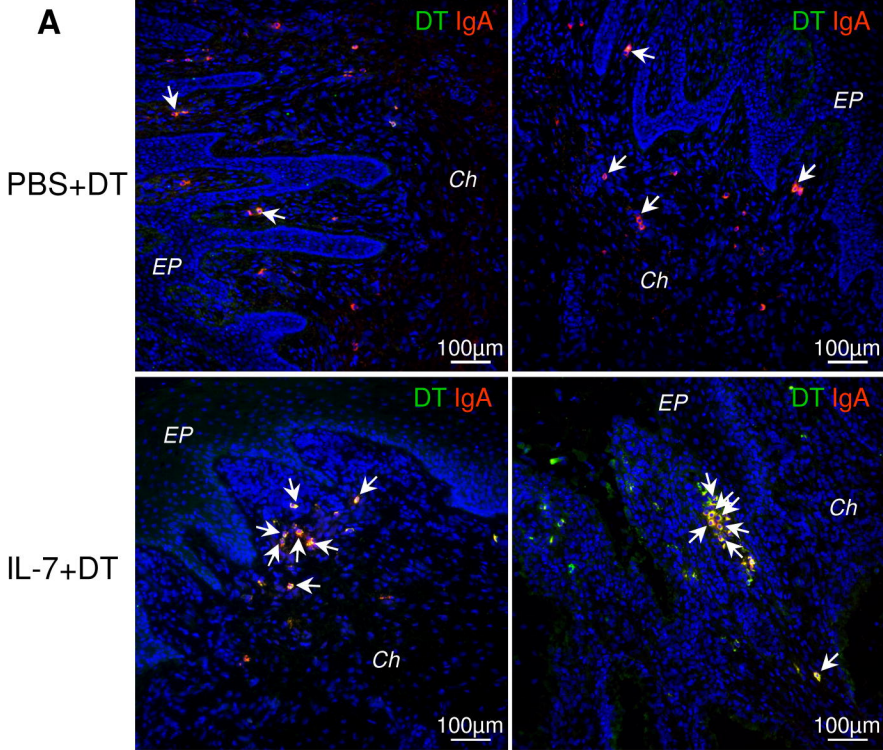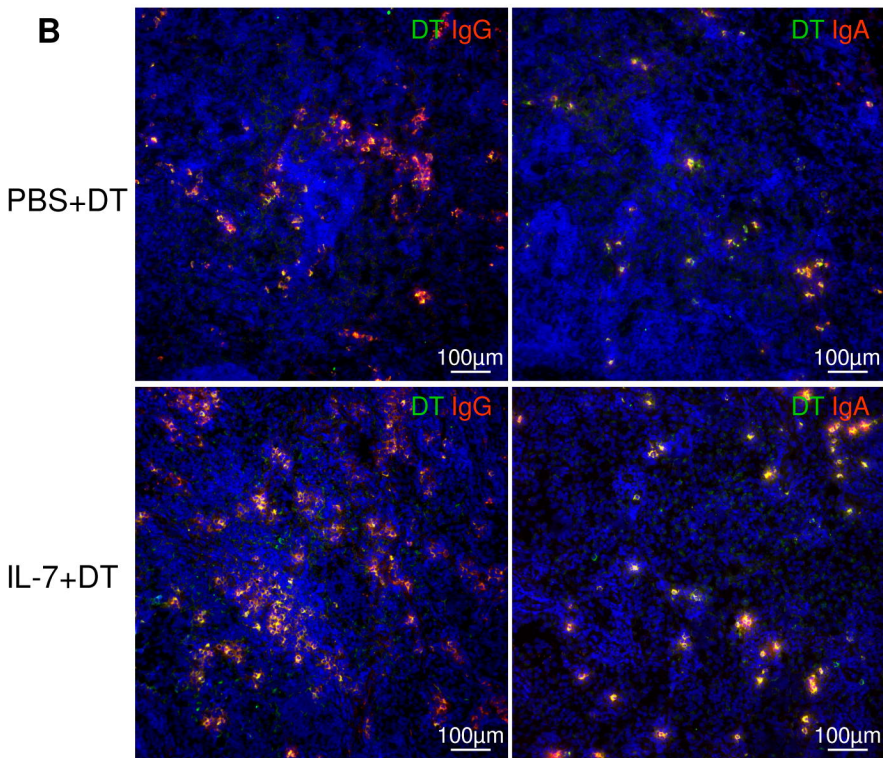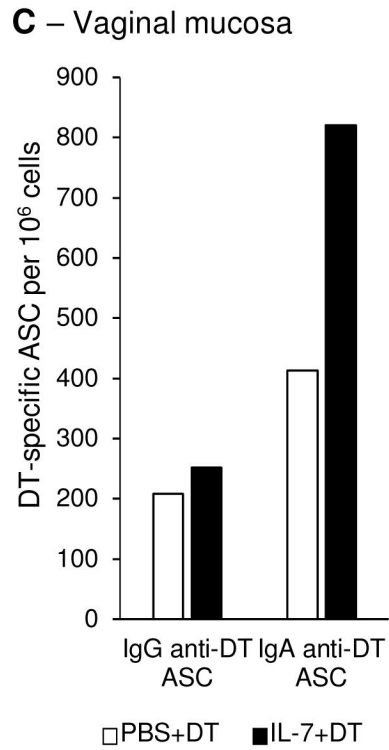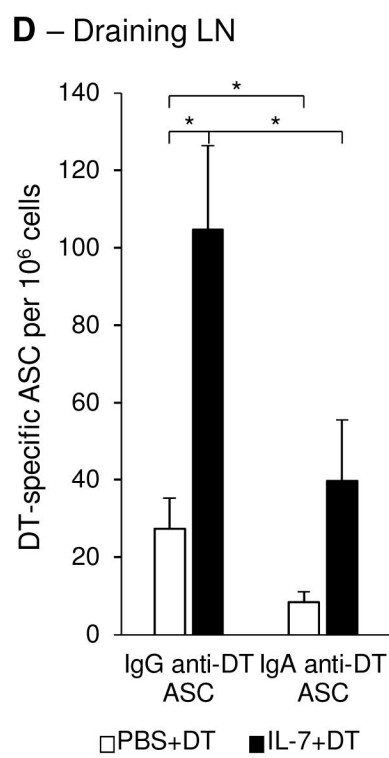

**A** – DT-specific IgG ASCs■ IL-7 + DT  
□ PBS + DT

p&lt;0.002

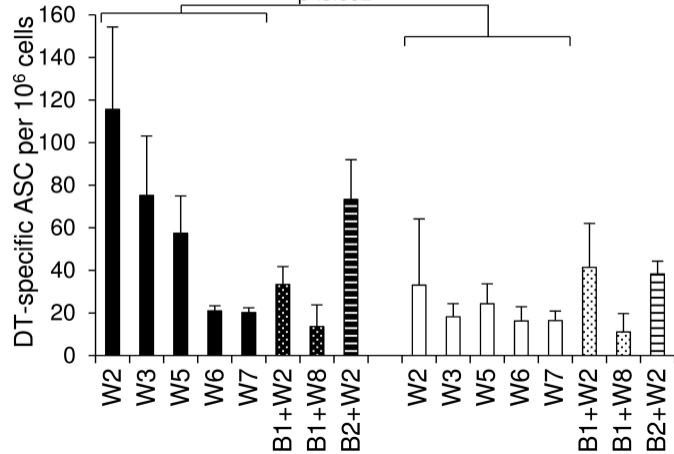**B** – DT-specific IgA ASCs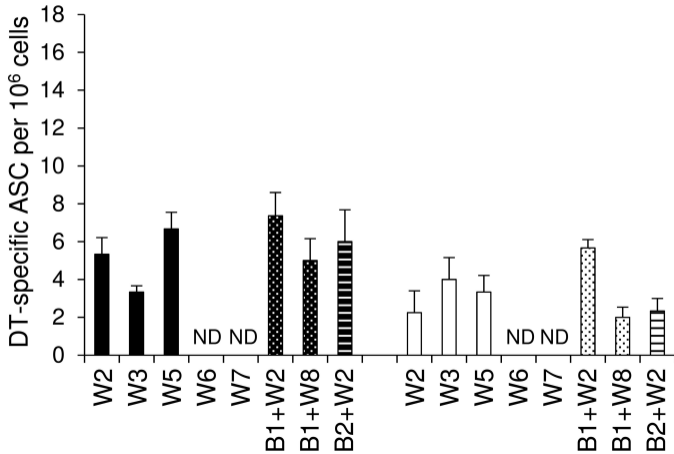

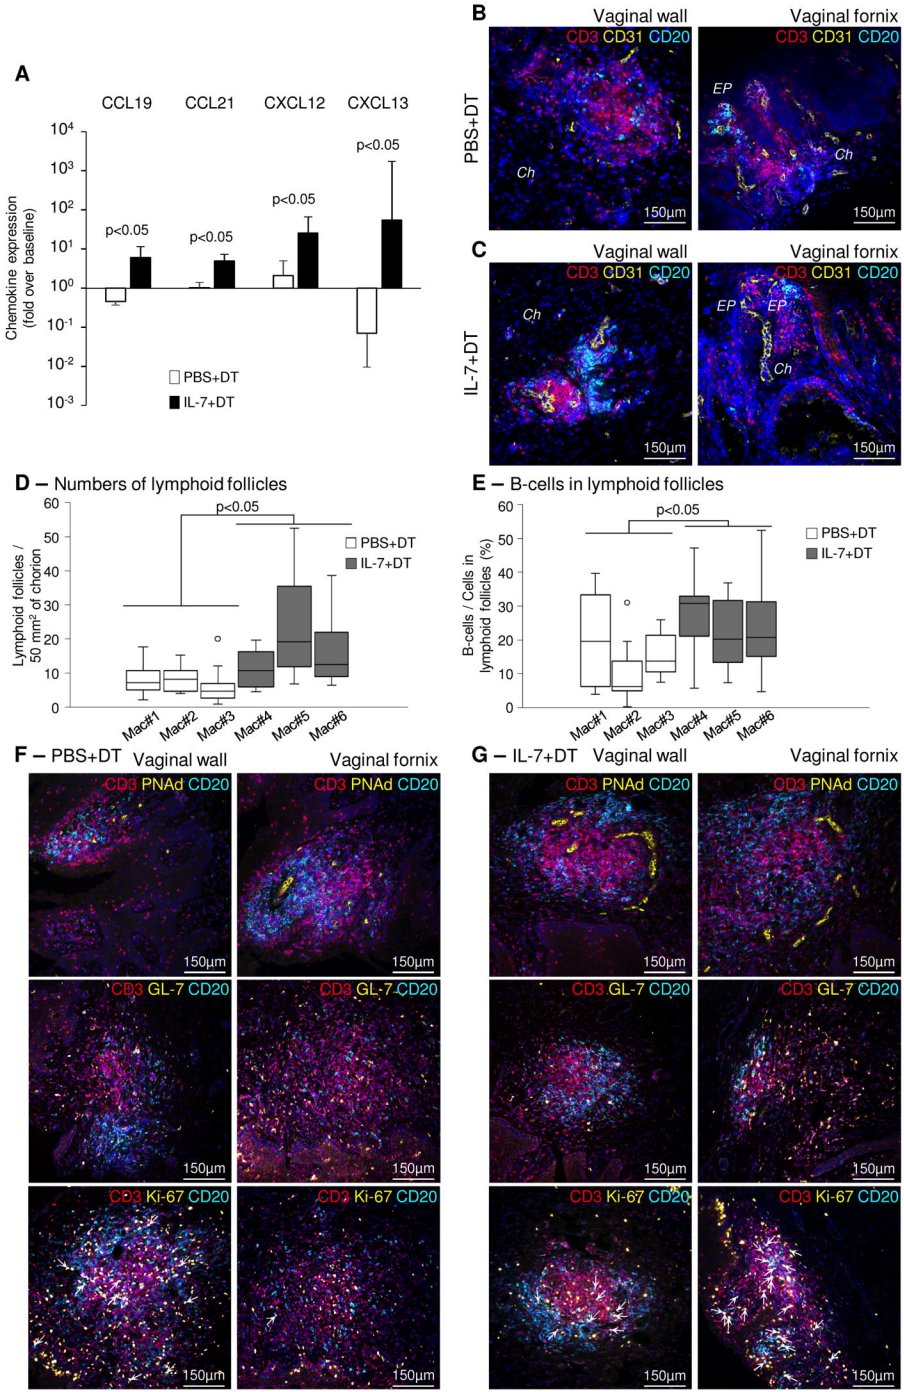

Source: http://biorxiv.org/content/10.1101/2020.11.09.374405v1.full.pdf
